# Supplementary material for: Direct determination of phenolic secoiridoids in olive oil by ultra-high performance liquid chromatography-triple quadruple mass spectrometry analysis
Source: PubMed Central journal article supplement (PMC6821043; doi:10.1038/s41598-019-52060-5), 2019-10-29
Supplement: 41598_2019_52060_MOESM1_ESM.pdf [file 41598_2019_52060_MOESM1_ESM.pdf]

## SUPPLEMENTARY INFORMATION

### Direct determination of four phenolic secoiridoids in oil olive by ultra-high performance liquid chromatography-triple quadruple mass spectrometry analysis

A. Luque-Muñoz,<sup>a</sup> R. Tapia,<sup>b</sup> A. Haidour,<sup>\*,a</sup> J. Justicia,<sup>b</sup> and J. M. Cuerva<sup>\*,b</sup>

<sup>a</sup> Nuclear Magnetic Resonance Unit, Scientific Instrumentation Center, University of Granada, E-18071 Granada, Spain

<sup>b</sup> Department of Organic Chemistry, University of Granada, Campus Fuentenueva s/n, E-18071 Granada, Spain

\* Corresponding authors: jmcuerva@ugr.es (Dr. Juan M. Cuerva), ahaidour@ugr.es (Dr. A. Haidour)

---

#### Contents

|                                                                                                                             |         |
|-----------------------------------------------------------------------------------------------------------------------------|---------|
| - Synthesis and purification of analytes                                                                                    | S1      |
| - <sup>1</sup> H, <sup>13</sup> C, 2D-COSY and 2D-HSQC spectra for <b>3</b>                                                 | S2-S3   |
| - <sup>1</sup> H, <sup>13</sup> C, 2D-COSY and 2D-HSQC spectra for <b>4</b>                                                 | S4-S5   |
| - <sup>1</sup> H, <sup>13</sup> C, 2D-COSY and 2D-HSQC spectra for <b>5</b>                                                 | S6-S7   |
| - <sup>1</sup> H, <sup>13</sup> C, 2D-COSY and 2D-HSQC spectra for <b>6</b>                                                 | S8-S9   |
| - <sup>1</sup> H, <sup>13</sup> C, and 2D-HSQC spectra for <b>1-d5</b>                                                      | S10-S11 |
| - Assignment of <sup>1</sup> H NMR spectrum for <b>3, 4, 5</b> and <b>6</b>                                                 | S12-S13 |
| - H1 and H3 assigned to each diastereomer of <b>4</b> and <b>6</b>                                                          | S14     |
| - 2D-HSQC assignment of the elenolic fragment for the diastereomers of <b>4</b> and <b>6</b>                                | S15     |
| - Mass spectral fragmentation of the [M-H] <sup>-</sup> ion of <b>3, 4, 5, 6</b> and <b>1-d5</b>                            | S16-S17 |
| - Proposed fragmentation mechanisms for <b>3, 4, 5</b> and <b>6</b>                                                         | S18     |
| - Chromatograms of ACN injections after analyzing a sample with absence and presence of TFH in the chromatographic gradient | S19     |
| - Chromatographic program of the analytical method                                                                          | S20     |
| - Supplementary references                                                                                                  | S21     |

## Synthesis and purification of analytes

The synthesis of the analytes was carried out using bibliography:

- Oleacein and oleocanthal were semi-synthesized in one step, using oleuropein and ligstroside as precursors, under Krapcho decarbomethoxylation conditions <sup>1</sup>, respectively.
- Monoaldehydic oleuropein aglycone and monoaldehydic ligstroside aglycone were synthesized from oleuropein and ligstroside, respectively, following the procedure described in literature <sup>2</sup>.

Oleuropein and ligstroside were extracted from olive leaves, after treatment in boiling water for 1 hour. Then, this aqueous phase was extracted with butanol (x2), dried over anhydrous Na<sub>2</sub>SO<sub>4</sub>, and the solvent was removed. The residue was purified by flash chromatography in silica gel (CH<sub>2</sub>Cl<sub>2</sub>: MeOH 8:2), to yield the corresponding oleuropein or ligstroside.

The analytes were purified by preparative HPLC. The column used was a Zorbax Rx-SIL column (5 m; 9.4 × 250 mm), and hexane and ethyl acetate were the solvents.

**Figure S1.**  $^1\text{H}$  NMR spectrum (up) and  $^{13}\text{C}$  NMR spectrum (down) of oleacein (**3**) in  $\text{CDCl}_3$ . These spectra match those of literature <sup>3-5</sup>.

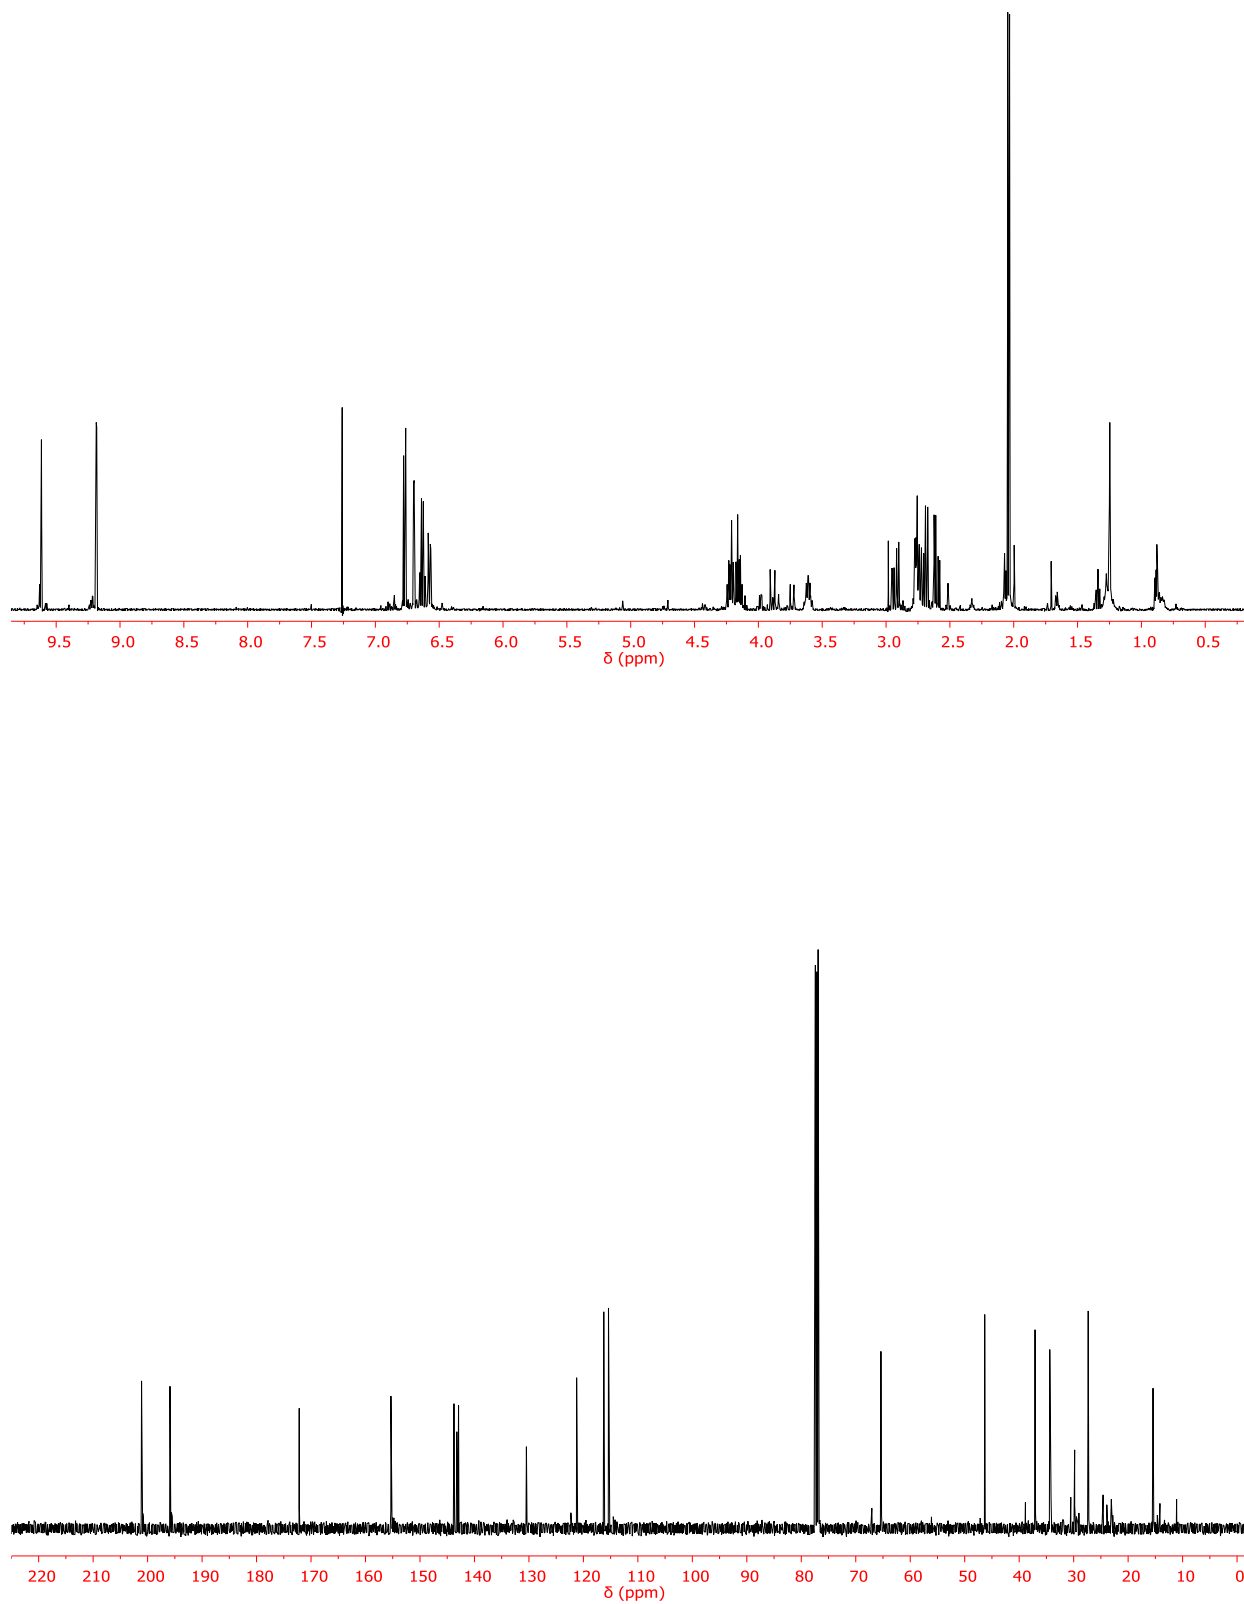

**Figure S2.** 2D-COSY spectrum (up) and 2D-HSQC spectrum (down) of oleacein (**3**) in CDCl<sub>3</sub>.

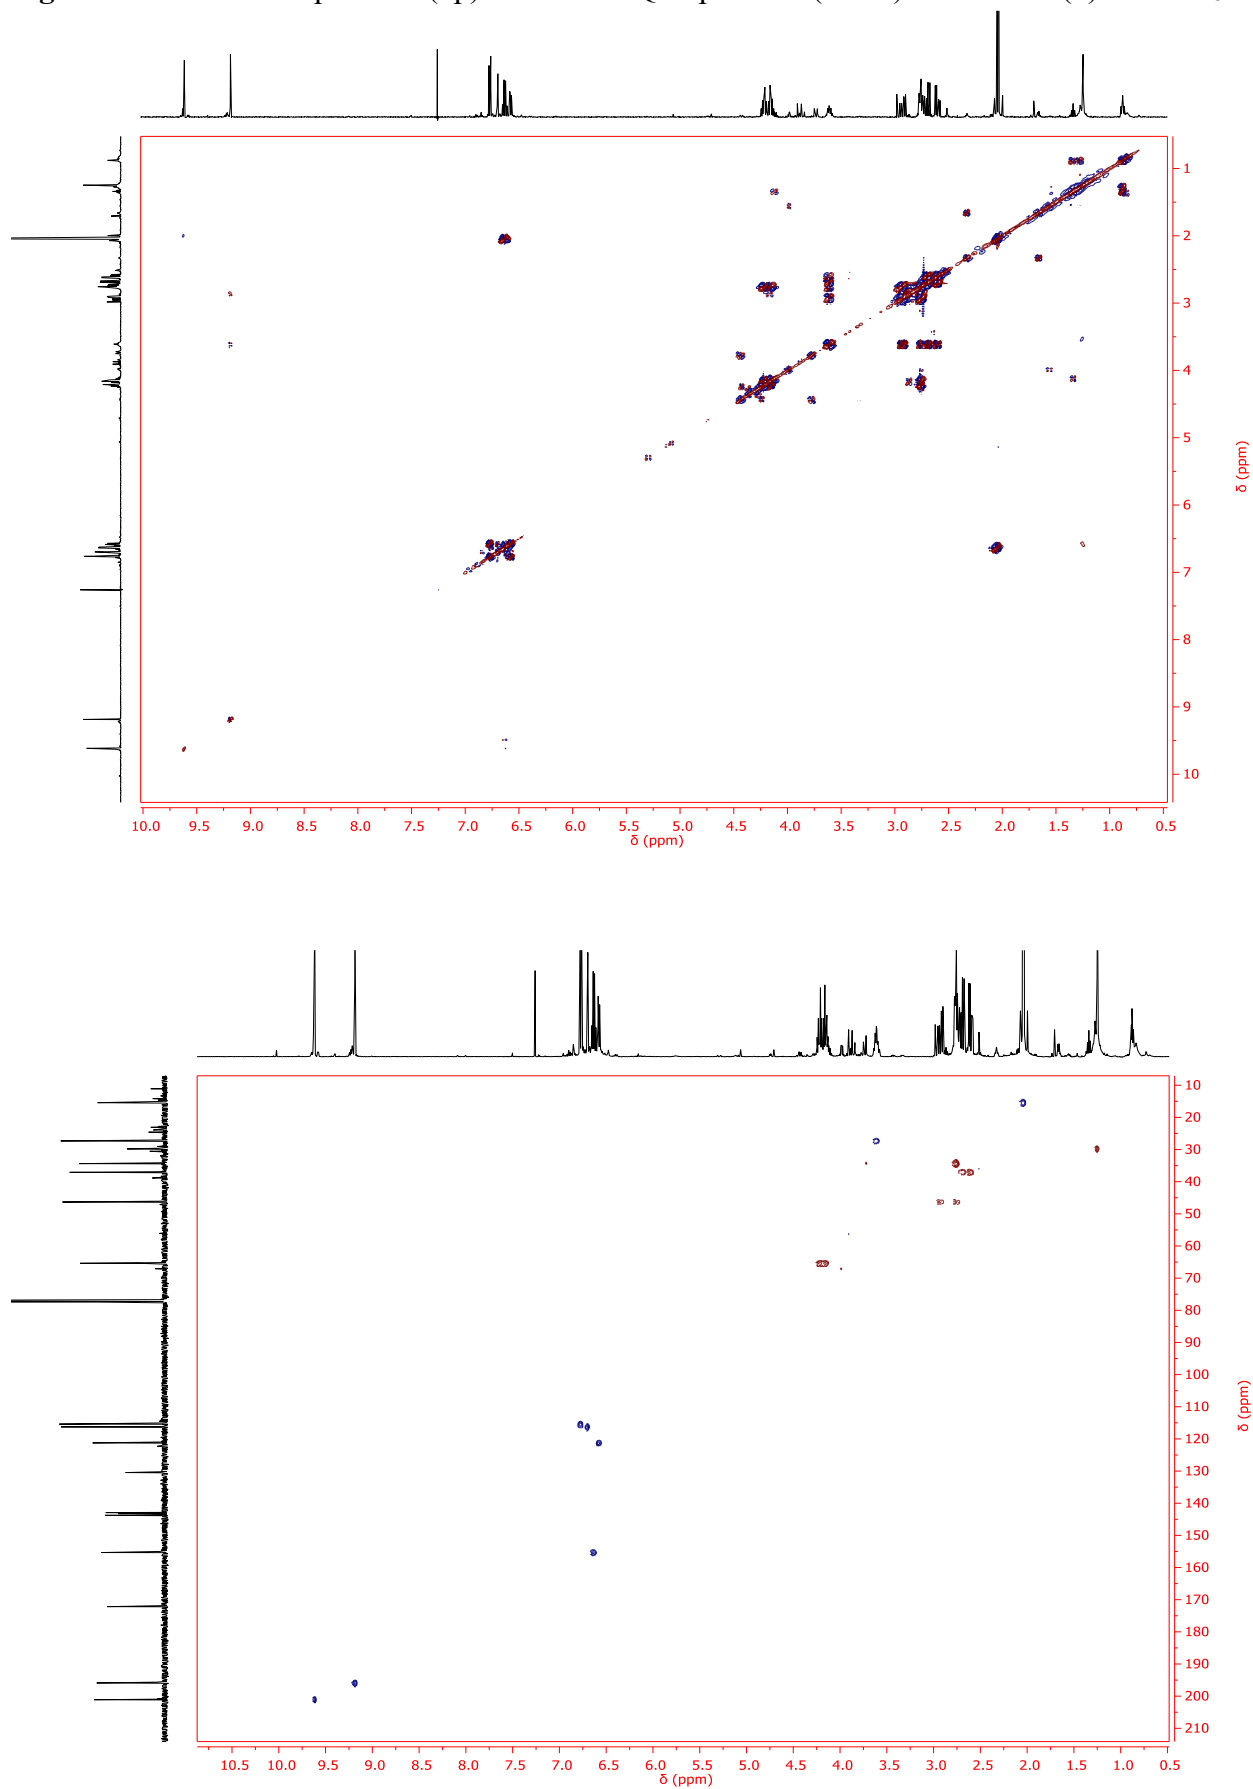

**Figure S3.**  $^1\text{H}$  NMR spectrum (up) and  $^{13}\text{C}$  NMR spectrum (down) of oleocanthal (**4**) in  $\text{CDCl}_3$ . These spectra match those of literature <sup>3-5</sup>.

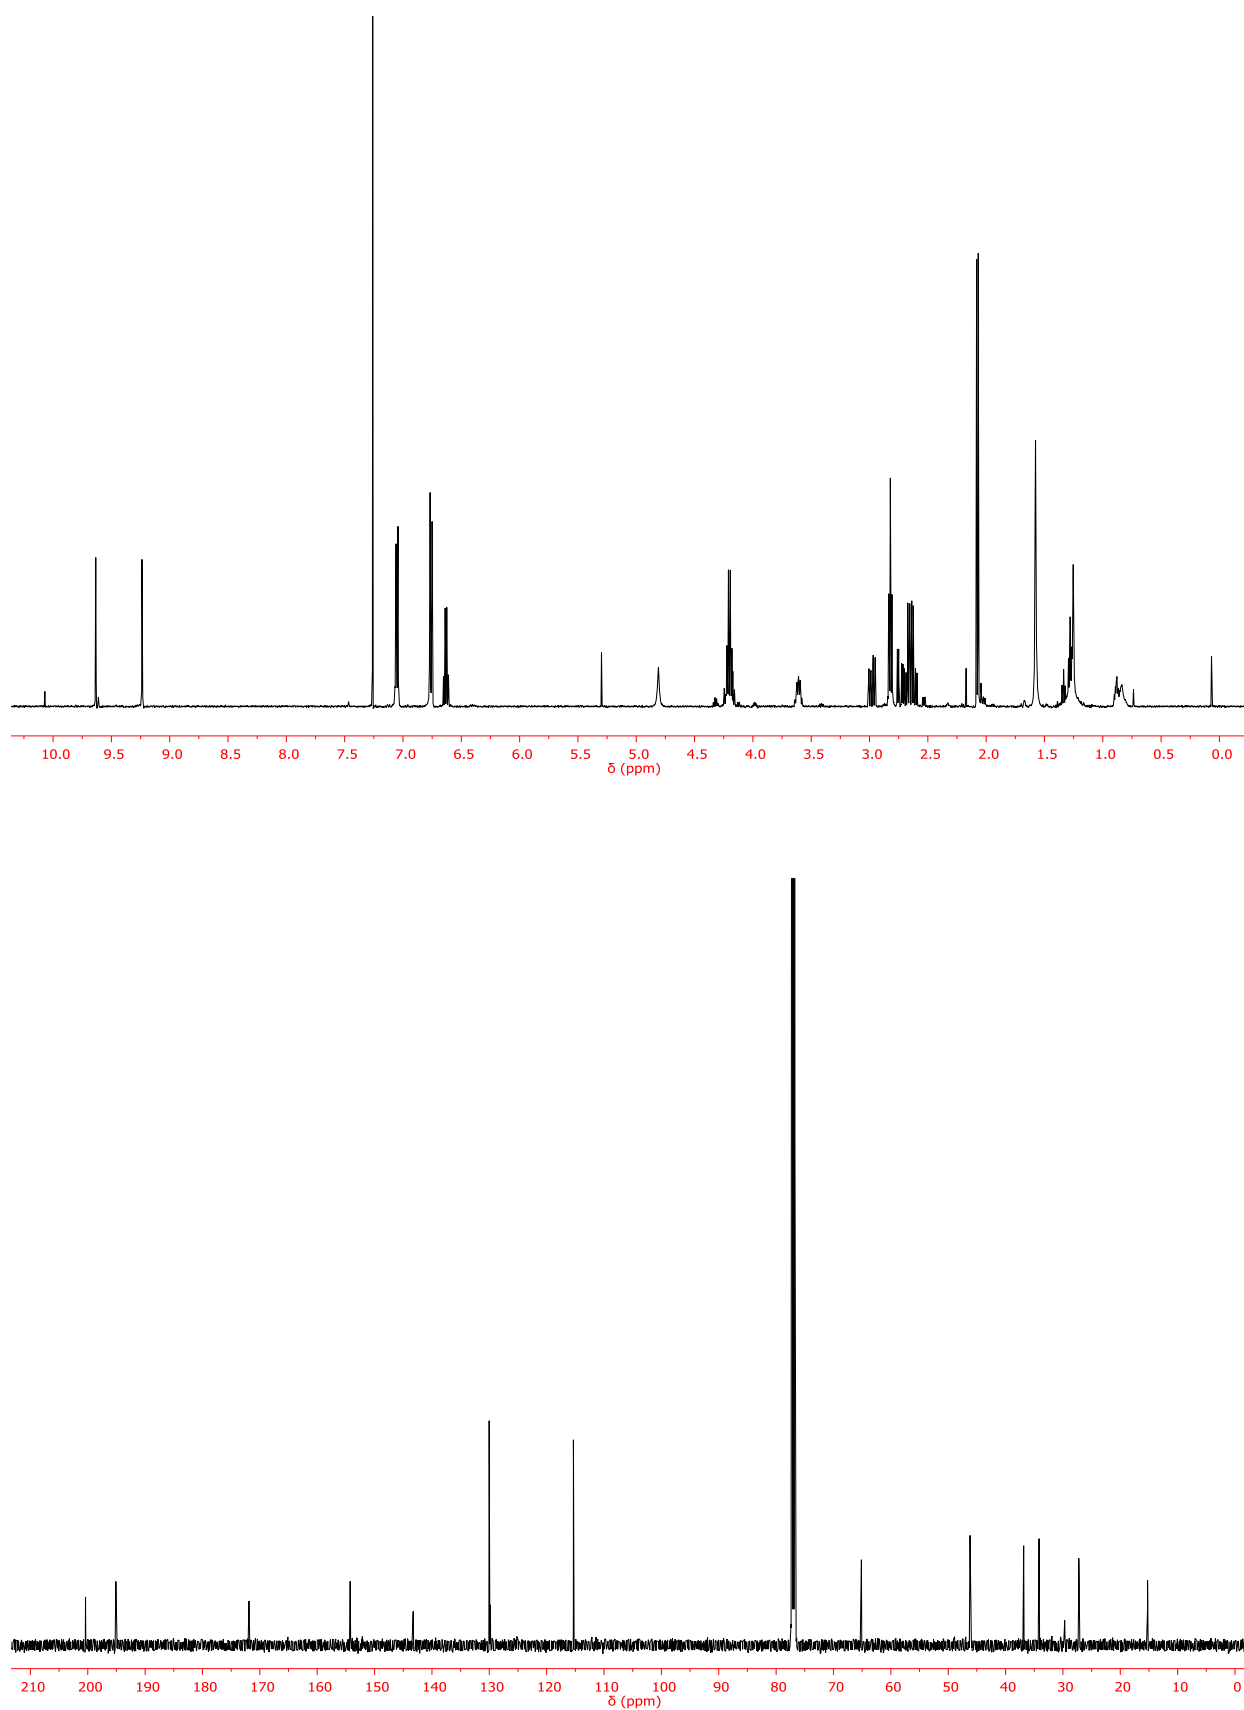

**Figure S4.** 2D-COSY spectrum (up) and 2D-HSQC spectrum (down) of oleocanthal (**4**) in CDCl<sub>3</sub>.

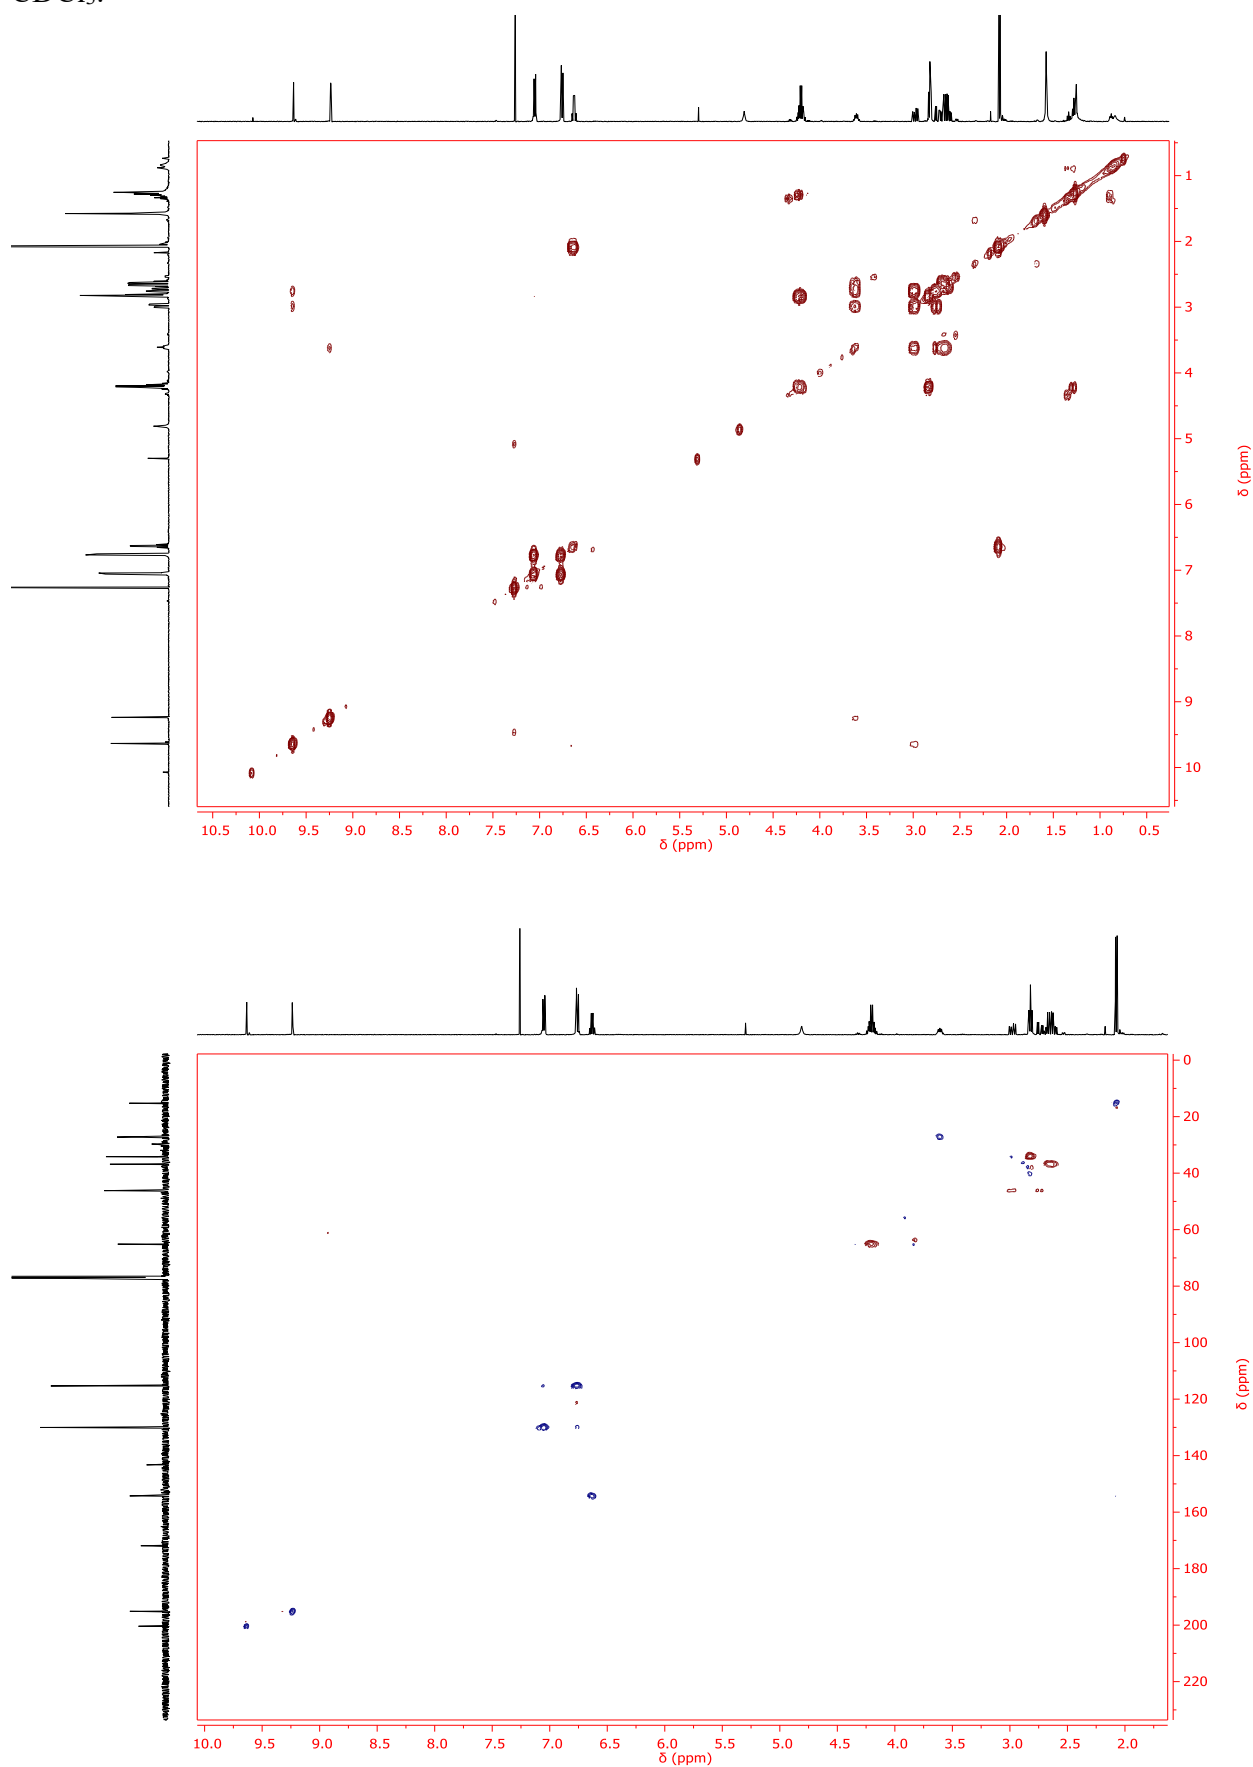

**Figure S5.**  $^1\text{H}$  NMR spectrum (up) and  $^{13}\text{C}$  NMR spectrum (down) of monoaldehydic oleuropein aglycone (**5**) in  $\text{CDCl}_3$ .  $^1\text{H}$  and  $^{13}\text{C}$  signal assignment has been done with the help of bibliography <sup>3,5-7</sup>. (5S,8S,9S) and (5S,8R,9S) diastereoisomers have already been described in  $\text{CDCl}_3$  <sup>7</sup>.

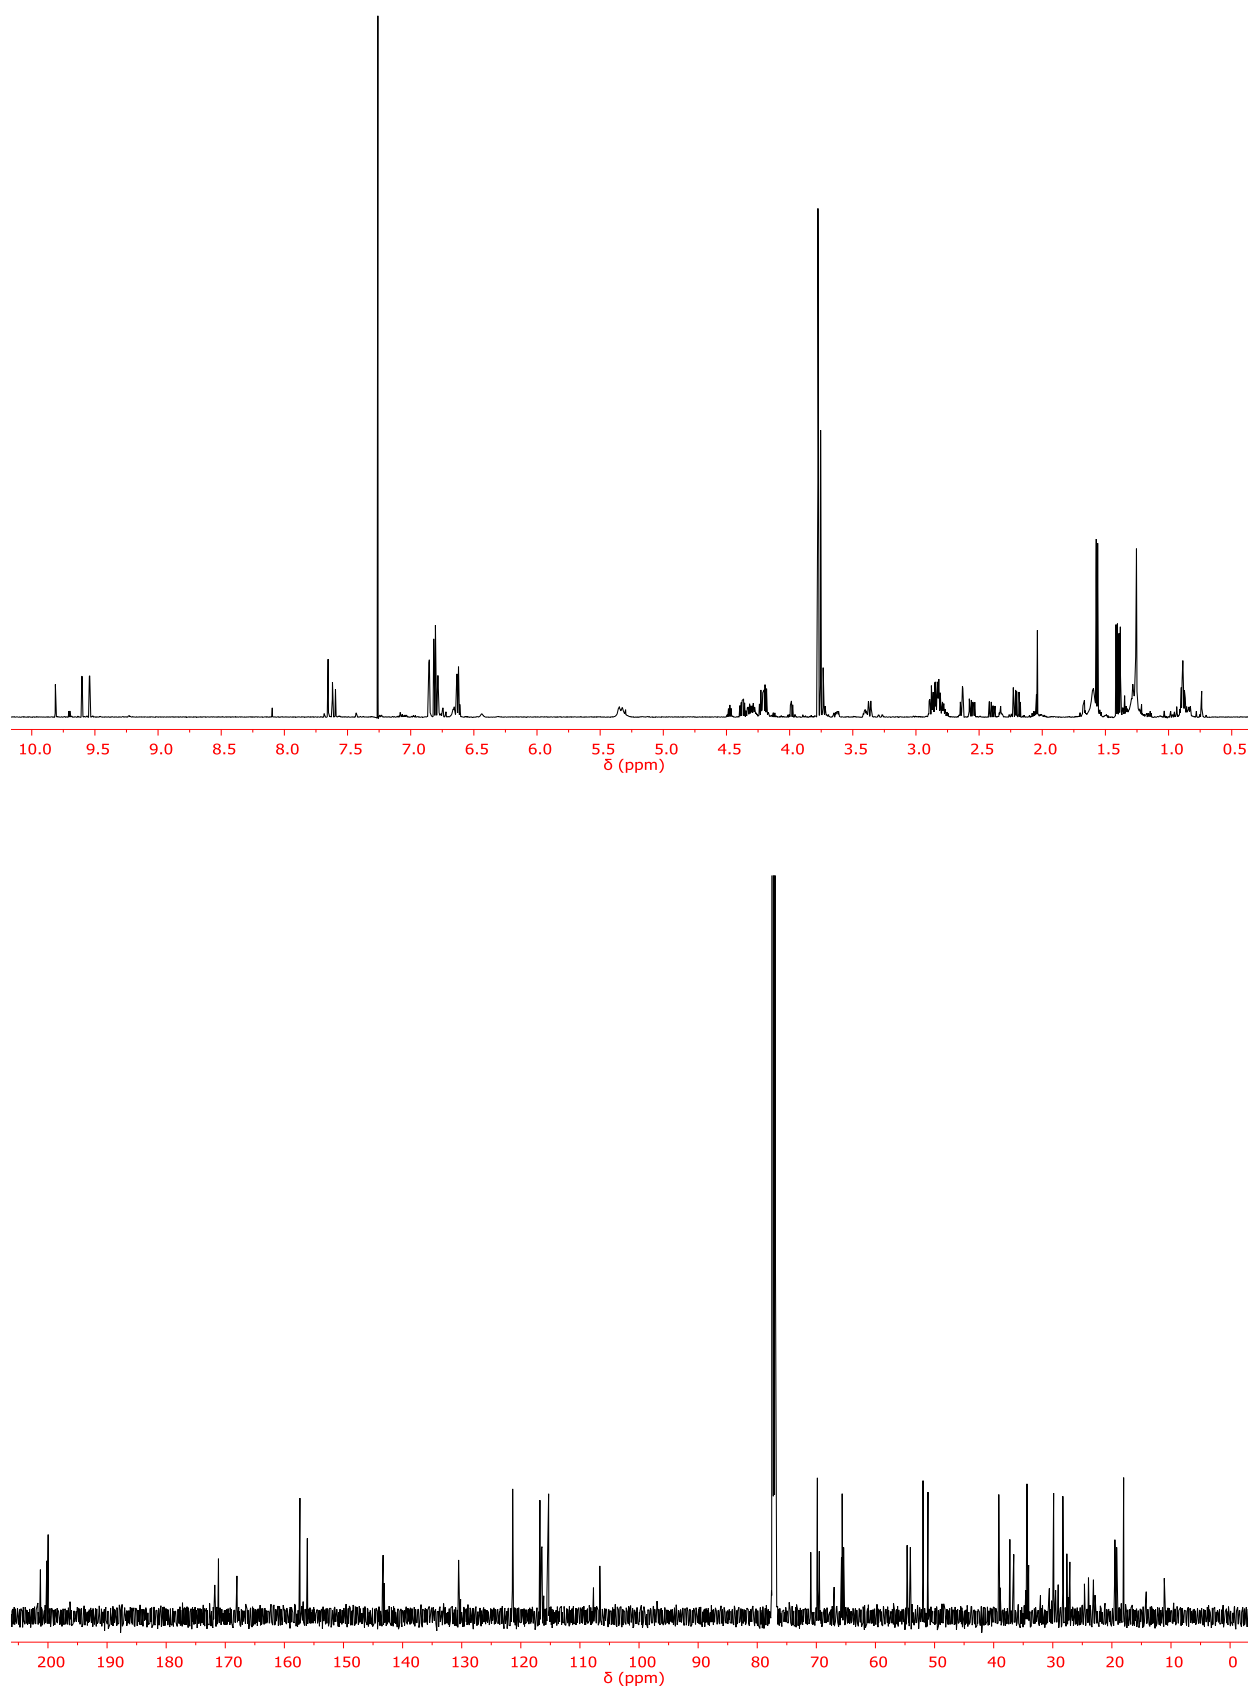

**Figure S6.** 2D-COSY spectrum (up) and 2D-HSQC spectrum (down) of monoaldehydic oleuropein aglycone (**5**) in CDCl<sub>3</sub>.

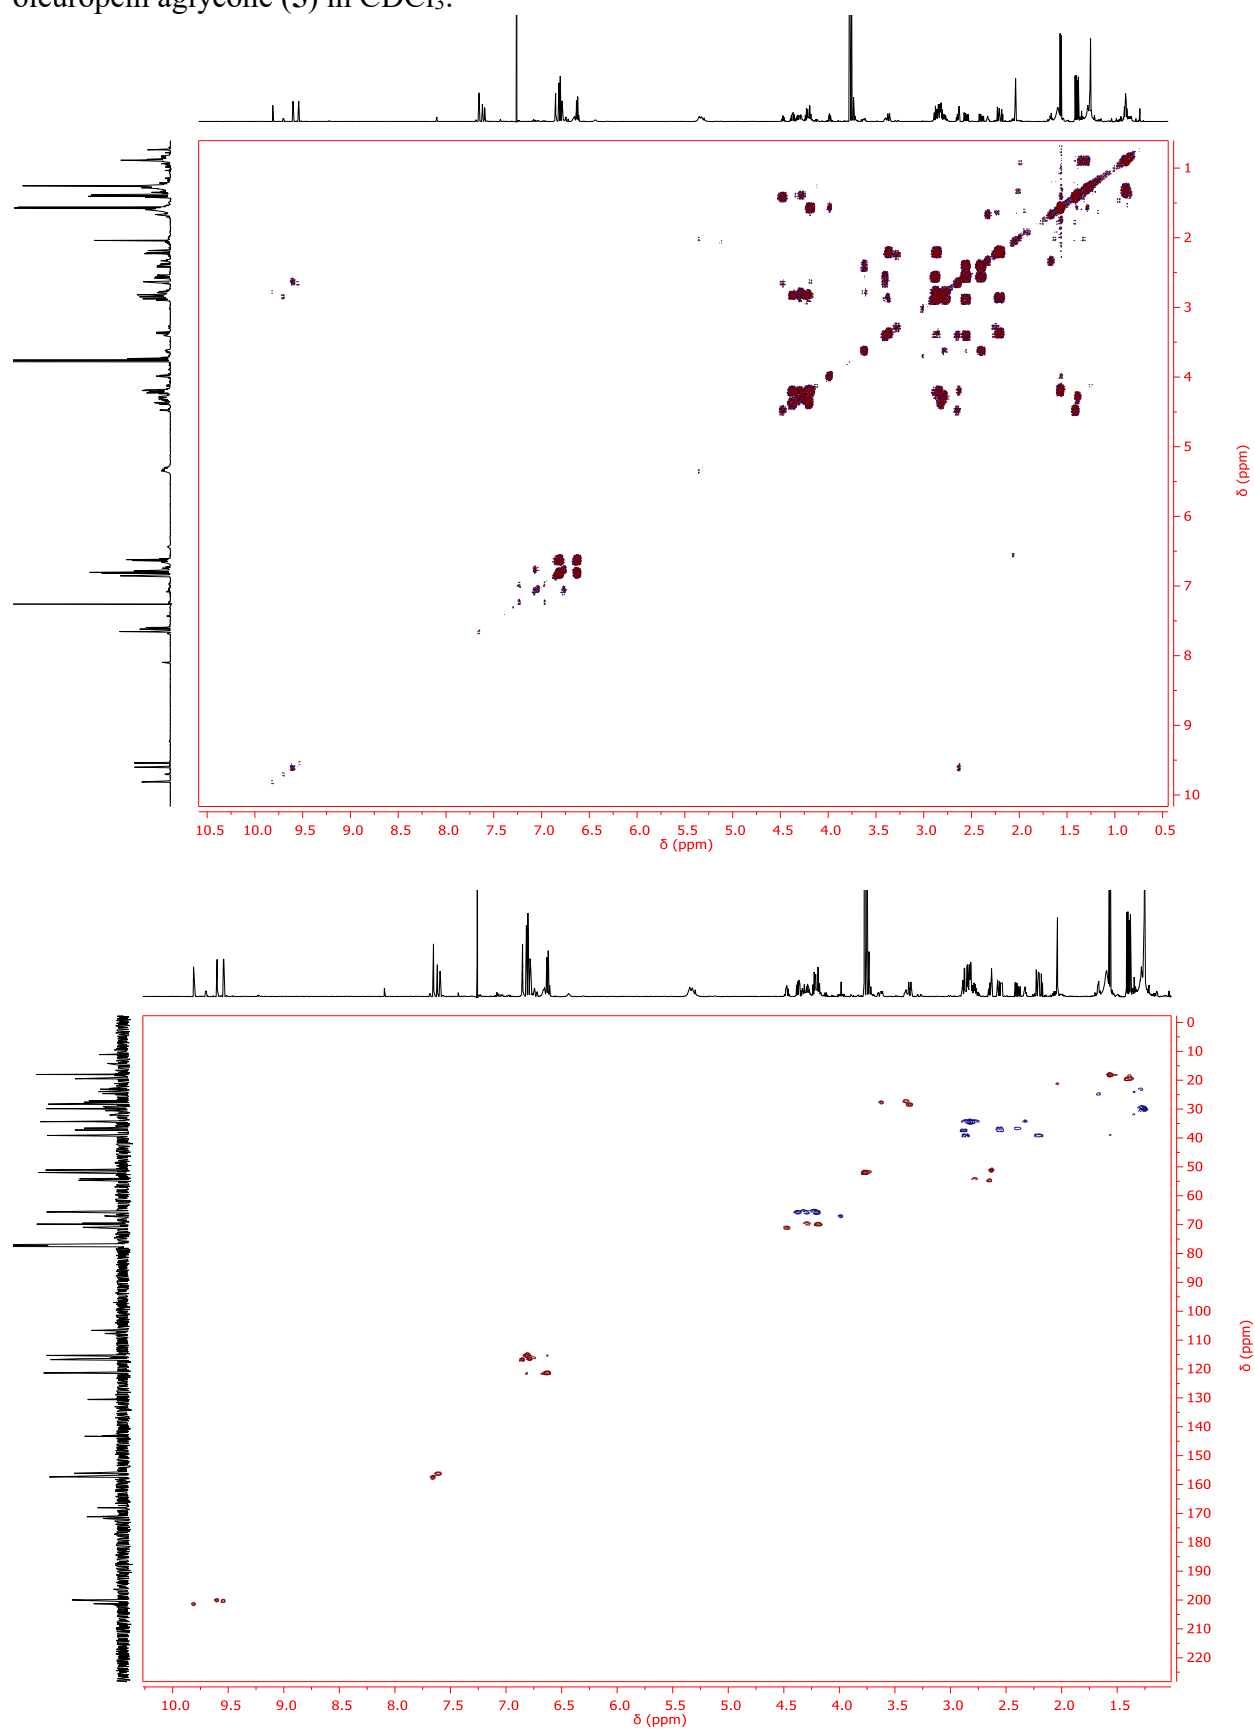



**Figure S7.**  $^1\text{H}$  NMR spectrum (up) and  $^{13}\text{C}$  NMR spectrum (down) of monoaldehydic ligstroside aglycone (**6**) in  $\text{CDCl}_3$ .  $^1\text{H}$  and  $^{13}\text{C}$  signal assignment has been done with the help of bibliography <sup>6,8</sup>. (5*S*,8*S*,9*S*) diastereoisomers have already been described in  $\text{CDCl}_3$  <sup>8</sup>.

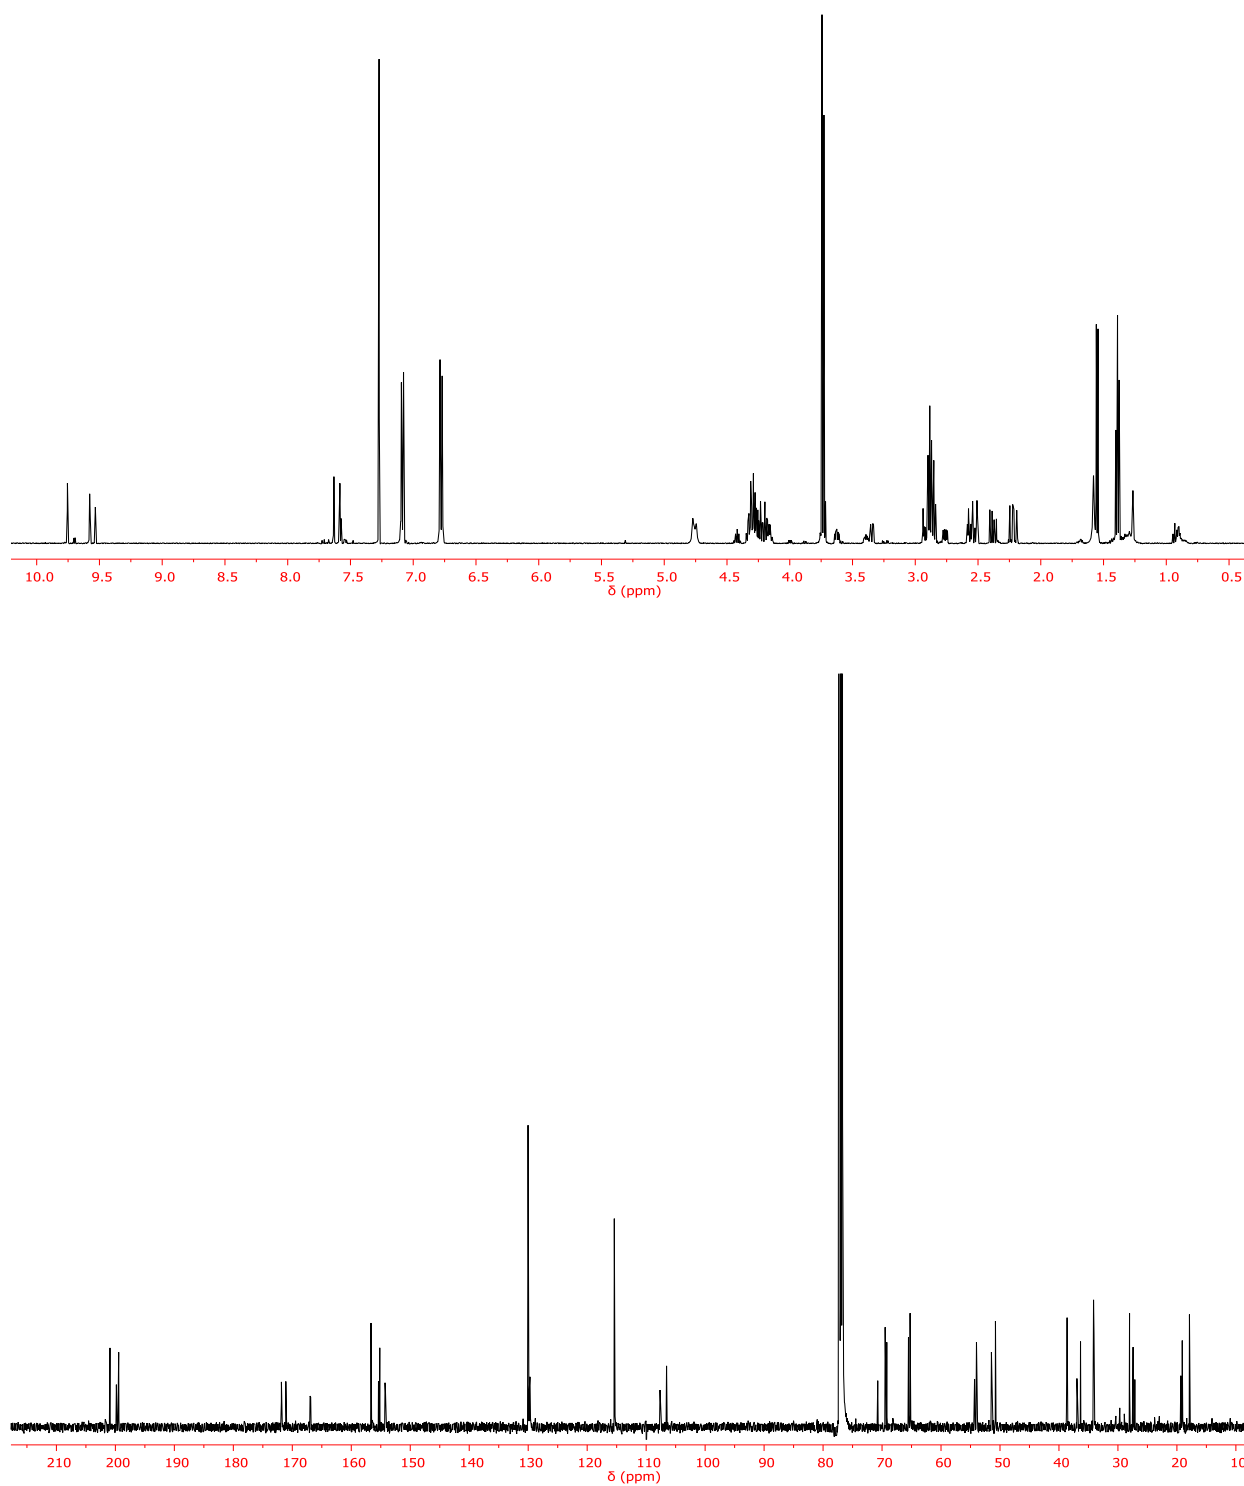

**Figure S8.** 2D-COSY spectrum (up) and 2D-HSQC spectrum (down) of monoaldehydic ligstroside aglycone (**5**) in CDCl<sub>3</sub>.

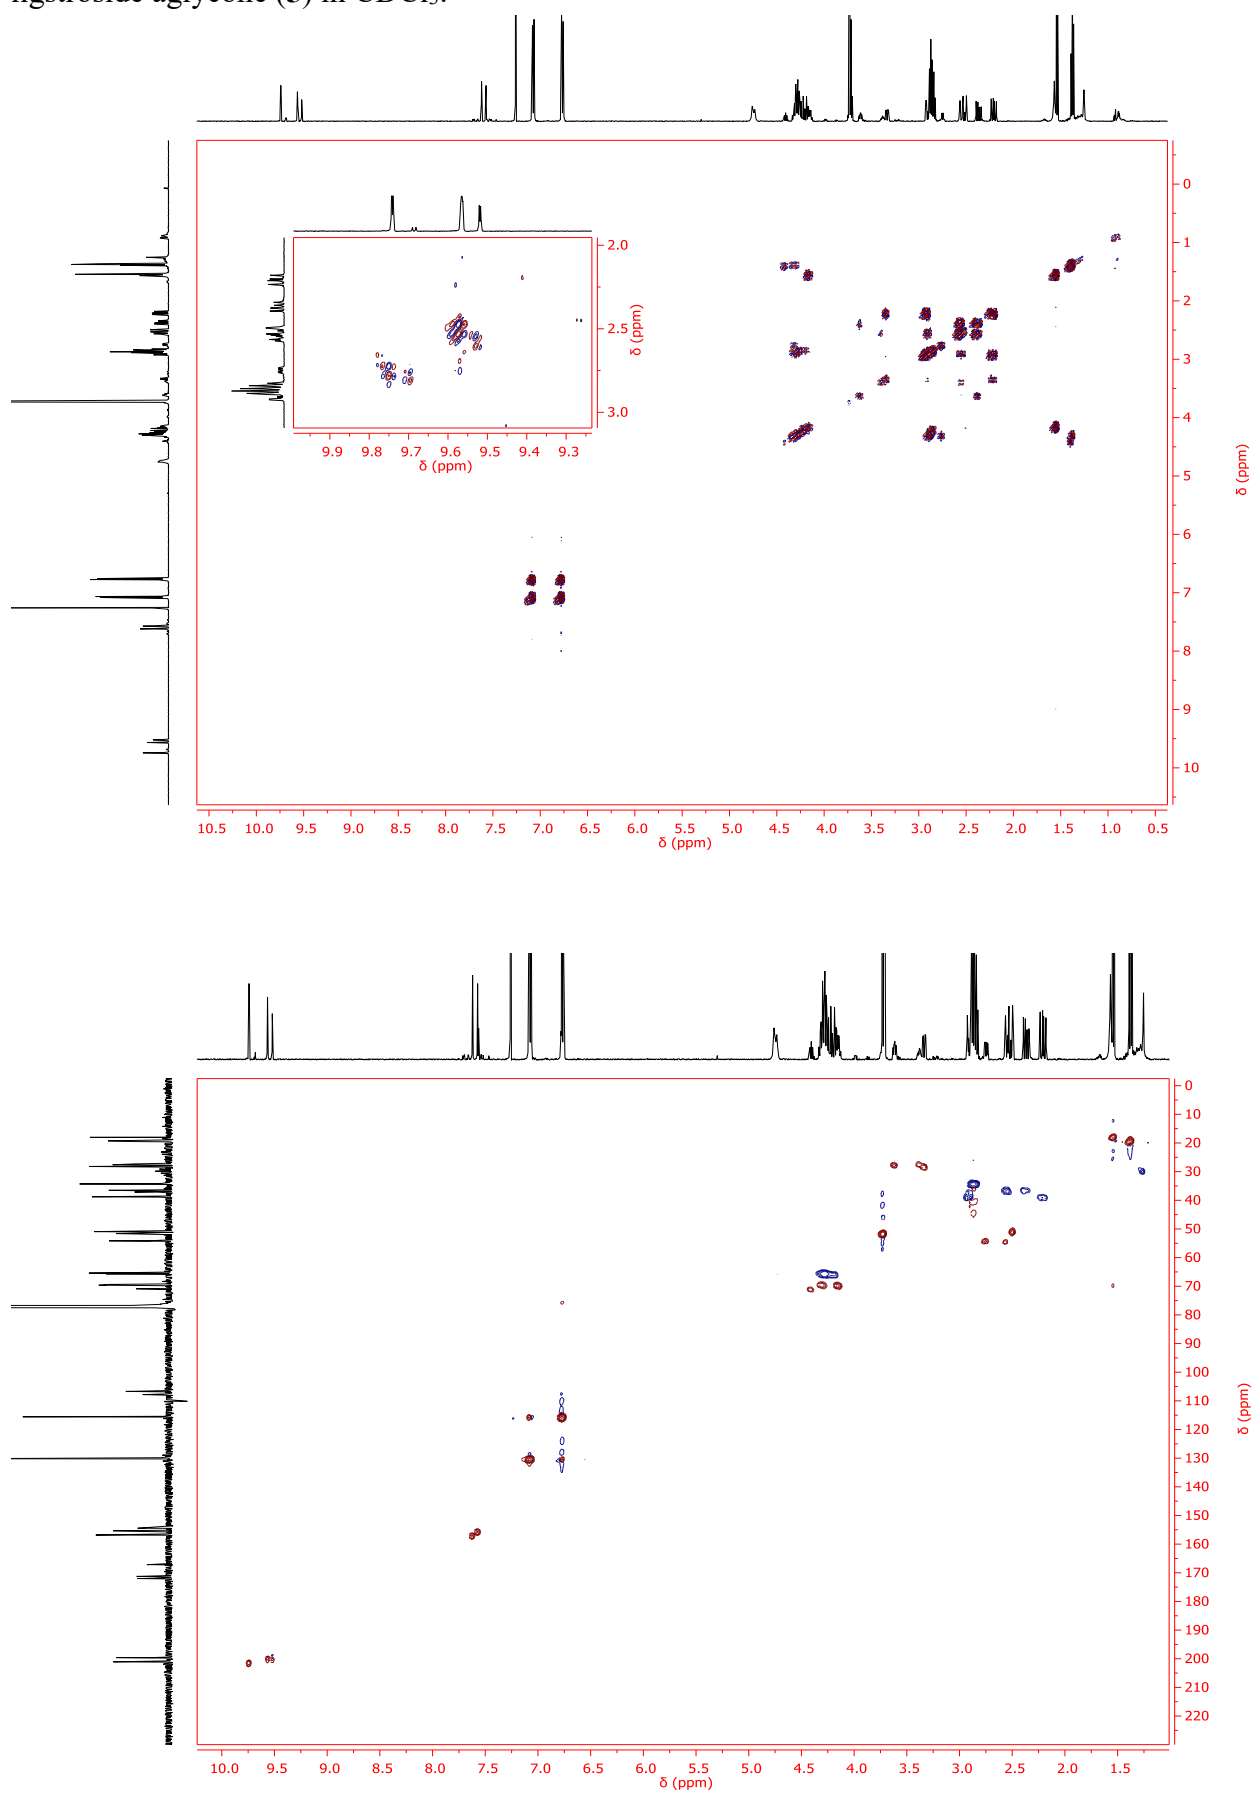

**Figure S9.**  $^1\text{H}$  NMR spectrum (up) and  $^{13}\text{C}$  NMR spectrum (down) of hydroxytyrosol- $\text{d}_5$  (**1-d<sub>5</sub>**) in  $\text{CD}_3\text{OD}$ .

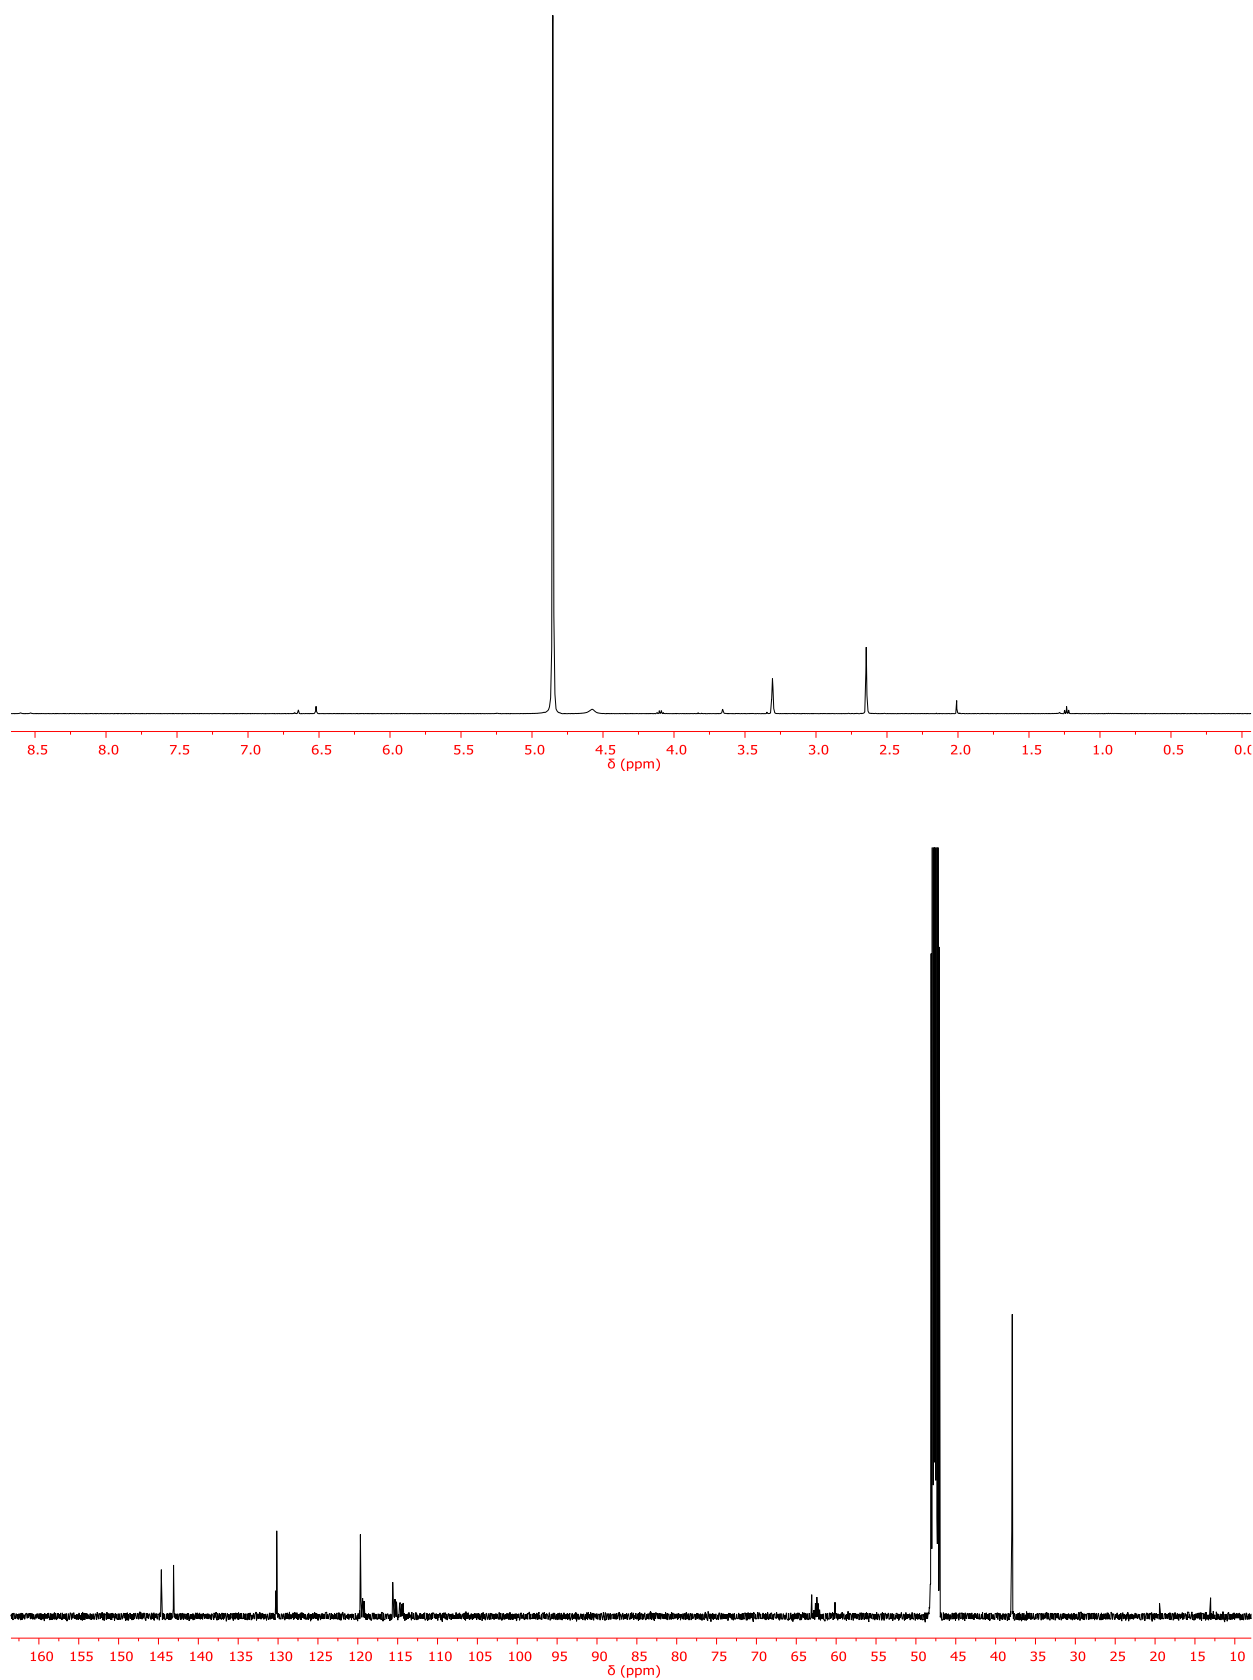

**Figure S10.** 2D-HSQC spectrum of hydroxytyrosol-d<sub>5</sub> (**1-d<sub>5</sub>**) in CD<sub>3</sub>OD.

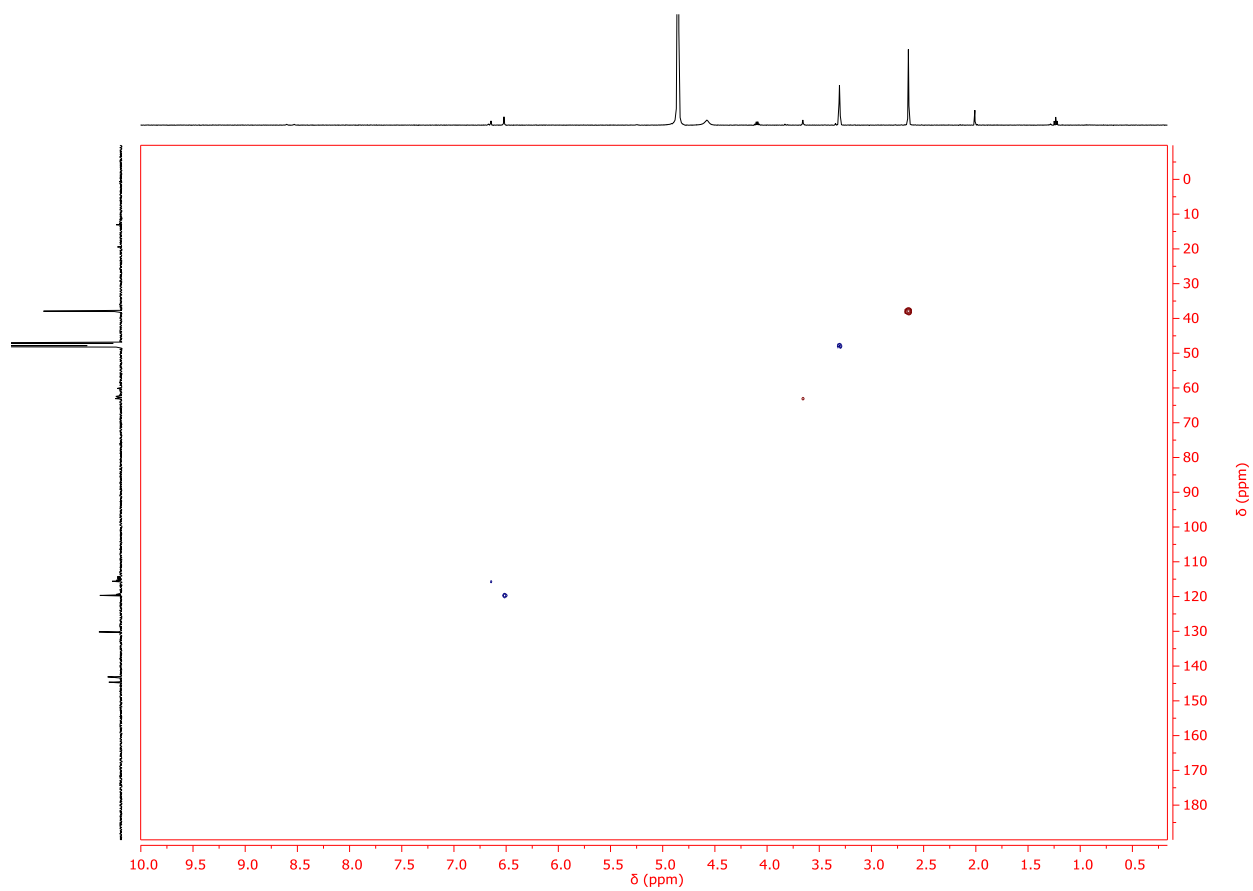

**Figure S11.** Assignment of  $^1\text{H}$  NMR spectrum for **3**, **4**, **5** and **6**.

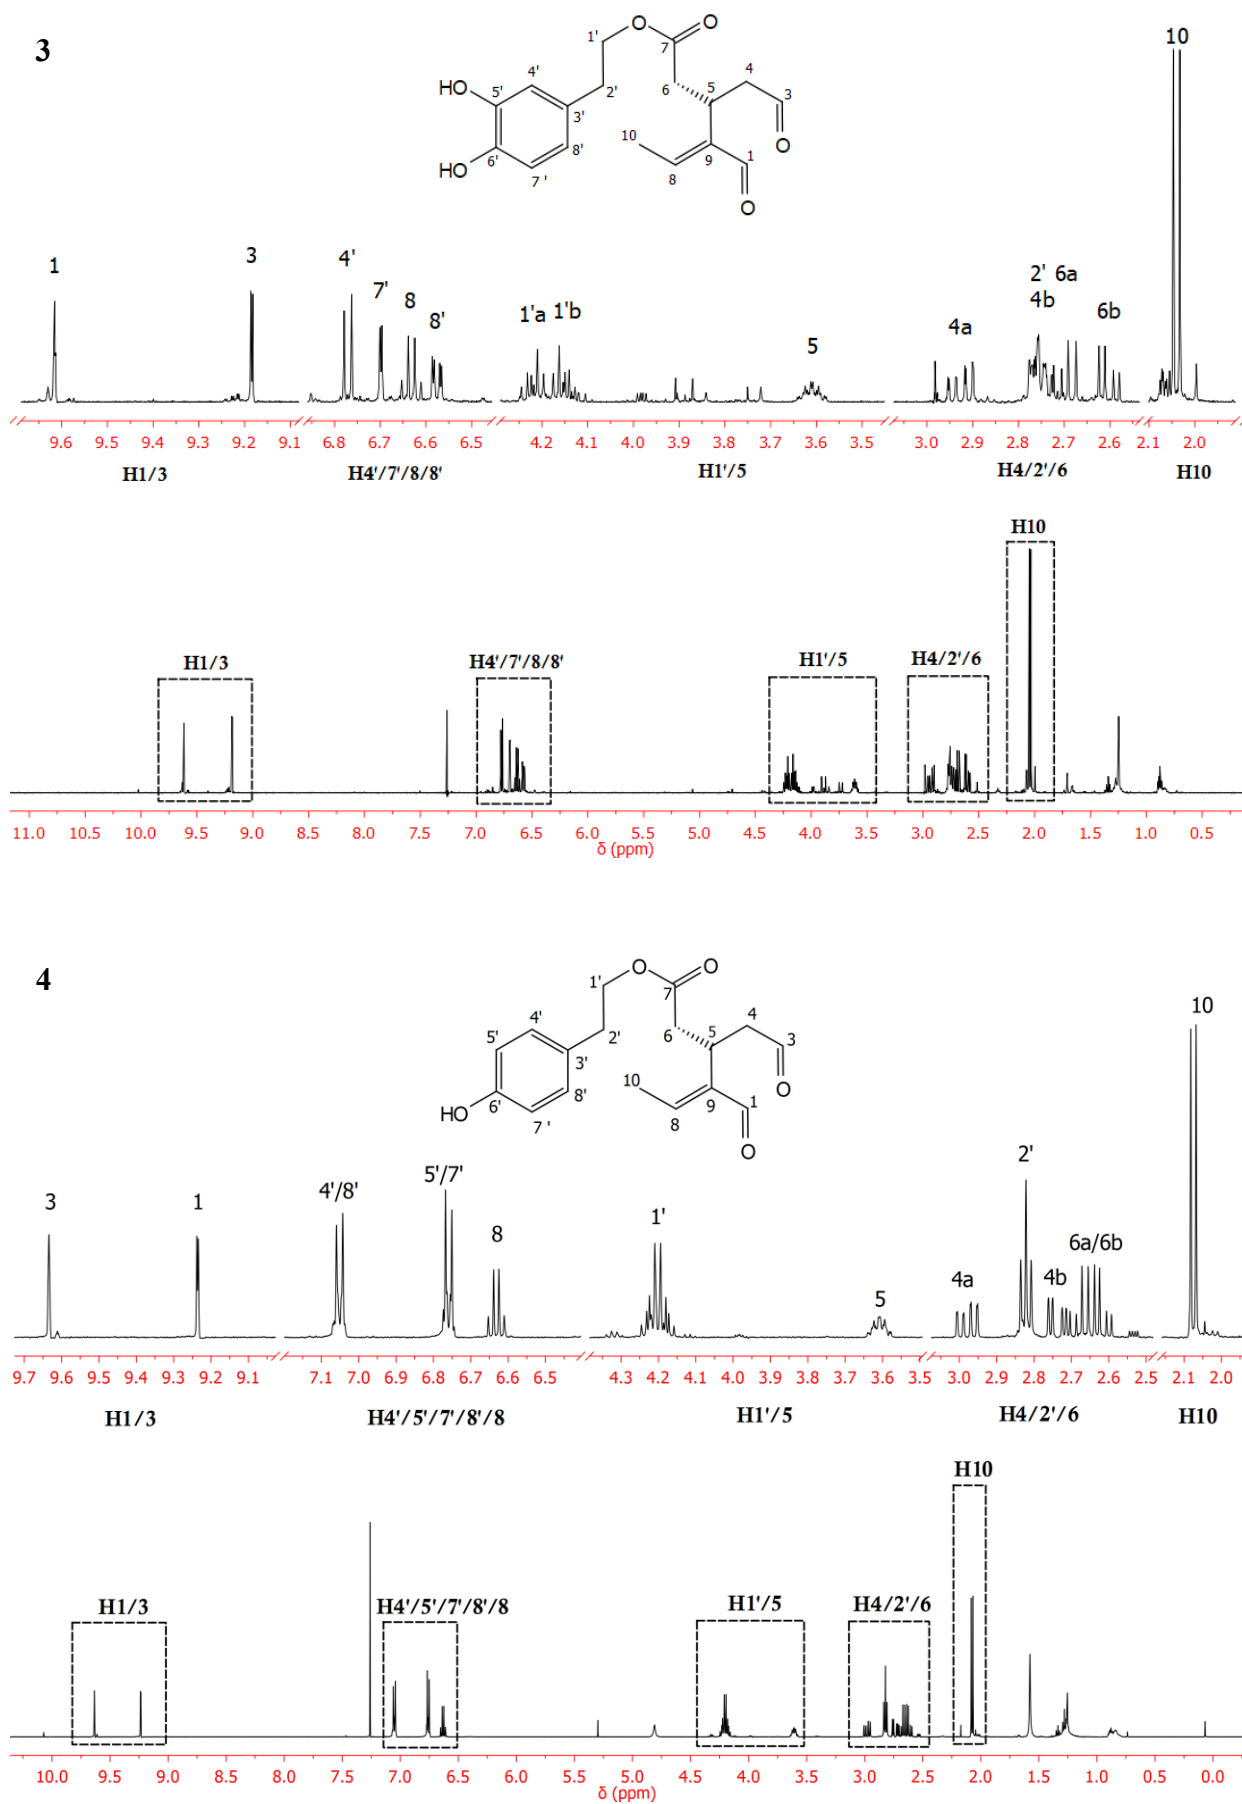

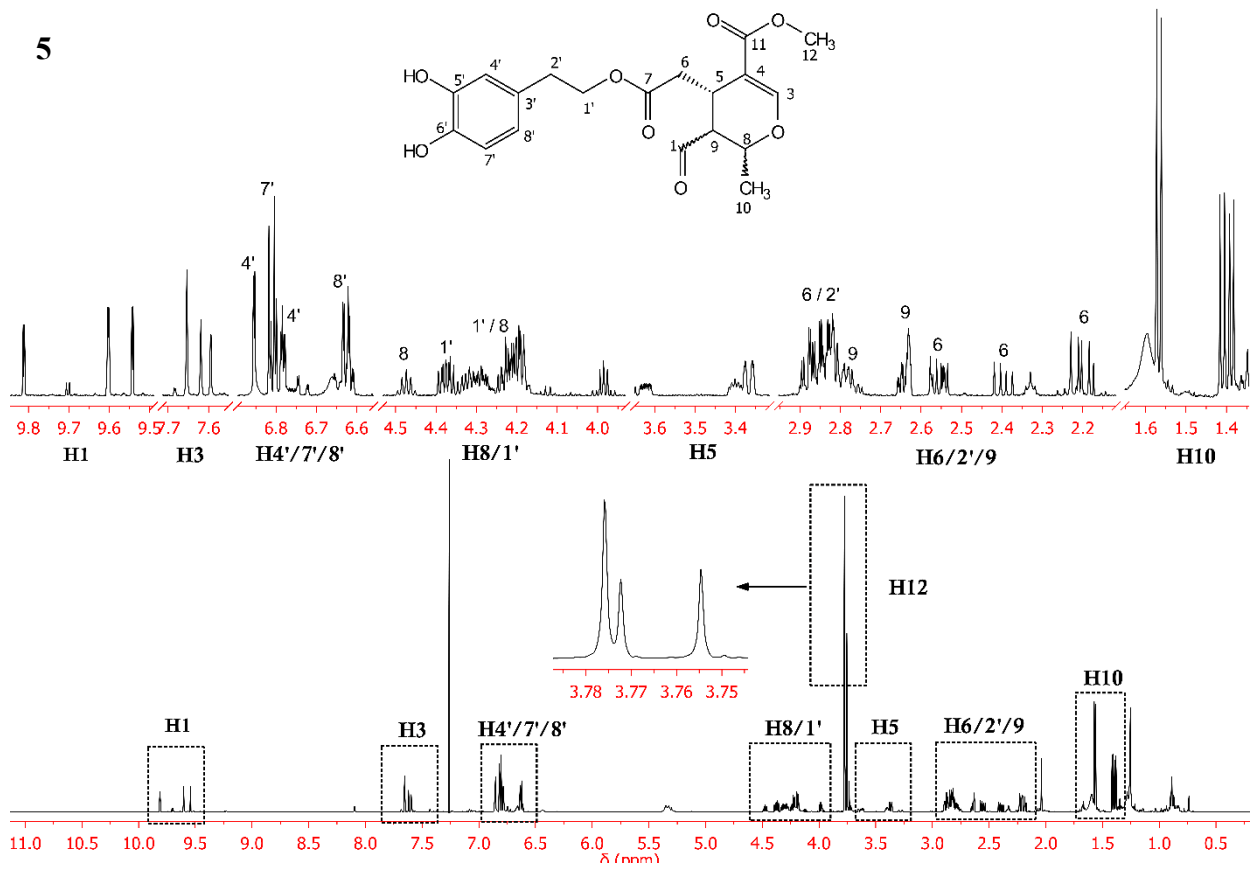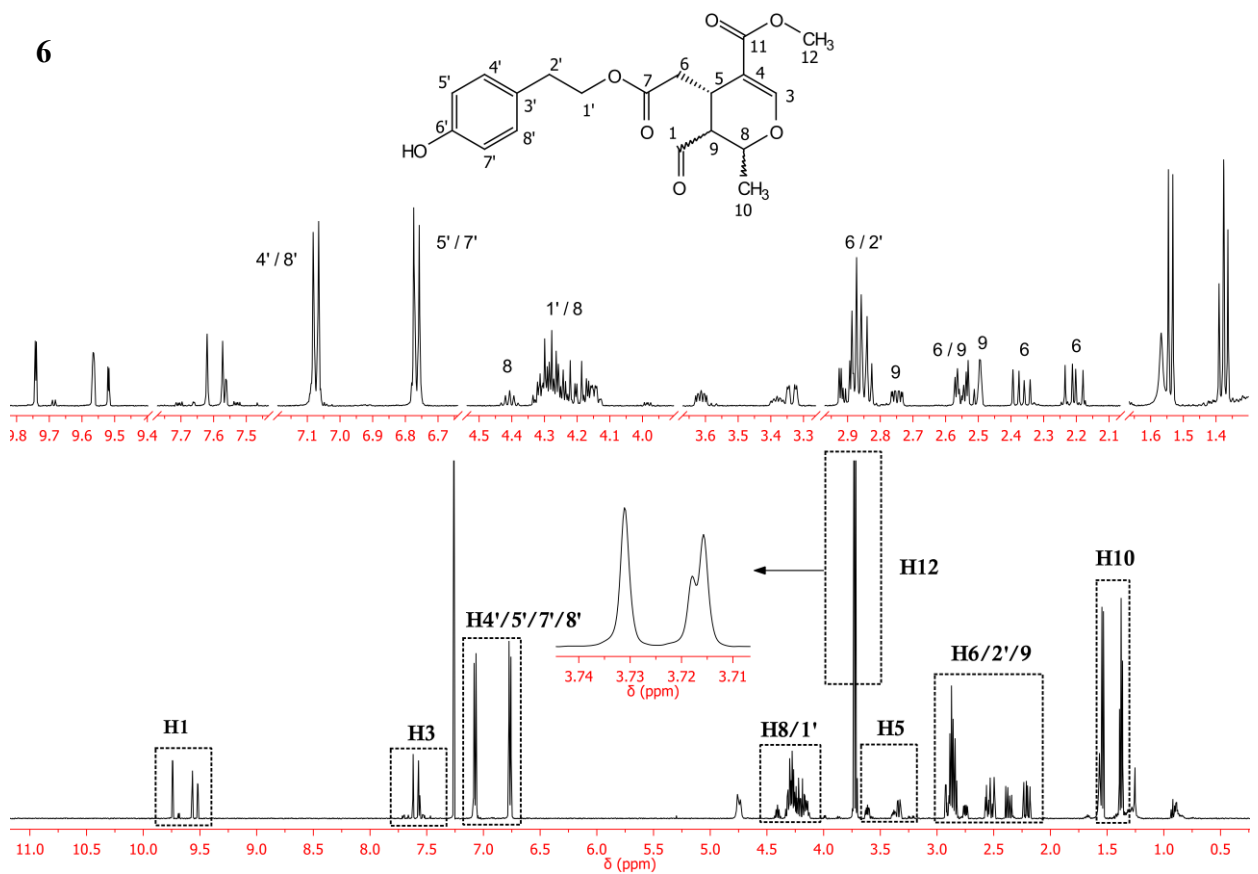

**Figure S12.** H1 and H3 assigned to each diastereomer of a) monoaldehydic oleuropein aglycone and b) monoaldehydic ligstroside aglycone.

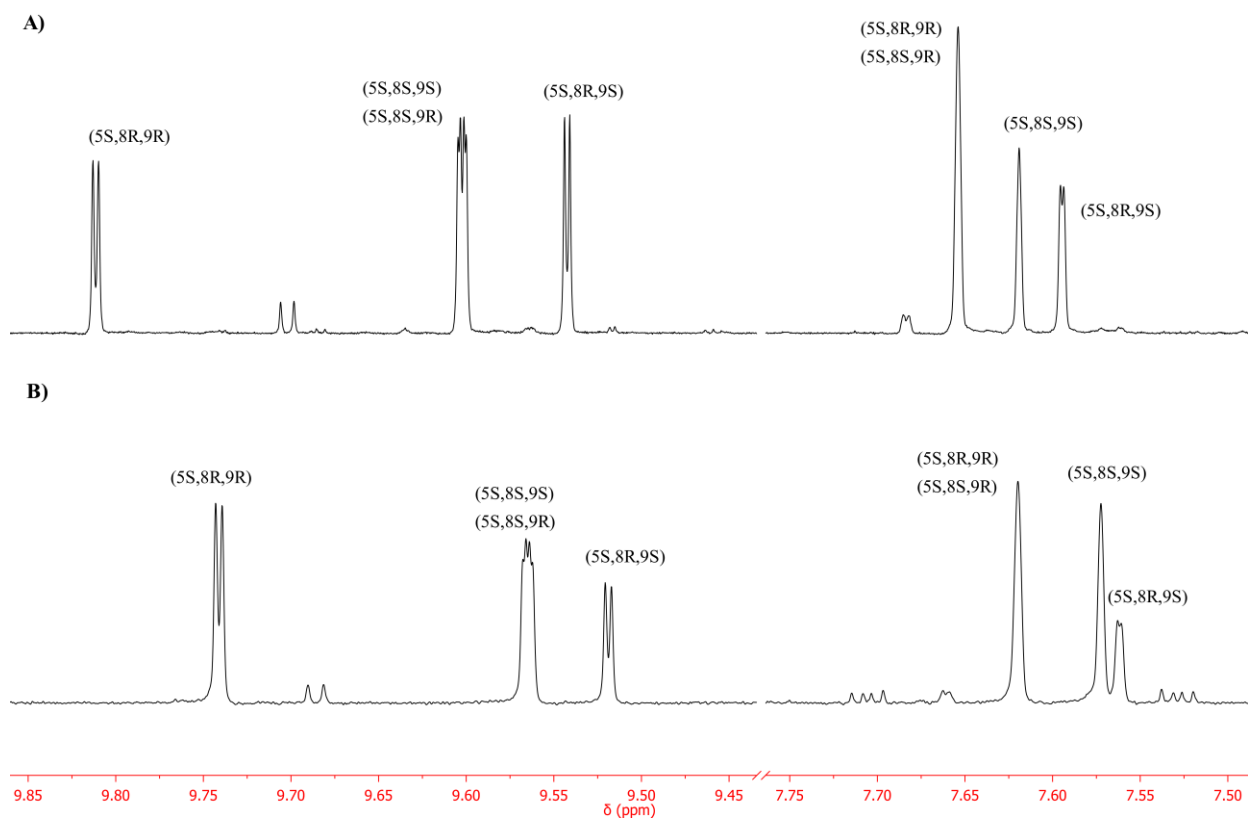

**Table S1.** 2D-HSQC assignment of the elenolic fragment for the diastereomers of monoaldehydic ligstroside aglycone using 2D-NOESY and 1D-TOCSY. C12 could not be assigned.

|    | (5S,8S,9S) / (5S,8S,9R)                        | (5S,8R,9R)             | (5S,8R,9S)             |
|----|------------------------------------------------|------------------------|------------------------|
| 1  | 9.56 – 199.59                                  | 9.74 – 201.08          | 9.52 – 200.00          |
| 3  | 7.62 – 156.82 (8S,9R)<br>7.57 – 155.55 (8S,9S) | 7.62 – 156.82          | 7.56 – 155.33          |
| 5  | 3.33 – 28.30                                   | 3.61 – 27.59           | 3.38 – 27.29           |
| 6  | 2.91 > 38.79<br>2.21 >                         | 2.55 > 36.50<br>2.37 > | 2.90 > 37.12<br>2.55 > |
| 8  | 4.15 – 69.64                                   | 4.30 – 69.36           | 4.41 – 70.89           |
| 9  | 2.50 – 50.93                                   | 2.75 – 54.15           | 2.56 – 54.17           |
| 10 | 1.54 – 18.03                                   | 1.37 – 19.25           | 1.38 – 19.50           |

**Table S2.** 2D-HSQC assignment of the elenolic fragment for the diastereomers of monoaldehydic oleuropein aglycone using 2D-NOESY and 1D-TOCSY. C12 could not be assigned.

|    | (5S,8S,9S) / (5S,8S,9R)        | (5S,8R,9R)             | (5S,8R,9S)             |
|----|--------------------------------|------------------------|------------------------|
| 1  | 9.60 – 199.96                  | 9.81 – 201.28          | 9.54 – 200.19          |
| 3  | 7.65 – 157.37<br>7.62 – 156.08 | 7.65 – 157.37          | 7.59 – 156.08          |
| 5  | 3.37 – 28.30                   | 3.62 – 27.62           | 3.40 – 27.11           |
| 6  | 2.86 > 39.13<br>2.21 >         | 2.56 > 36.61<br>2.40 > | 2.88 > 37.27<br>2.56 > |
| 8  | 4.19 – 69.83                   | 4.29 – 69.52           | 4.47 – 70.96           |
| 9  | 2.63 – 51.13                   | 2.78 – 54.10           | 2.65 – 54.66           |
| 10 | 1.57 – 18.02                   | 1.39 – 19.20           | 1.41 – 19.50           |

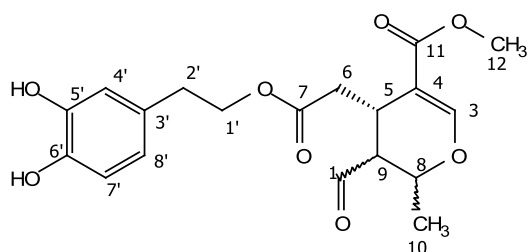

Monoaldehydic oleuropein aglycone

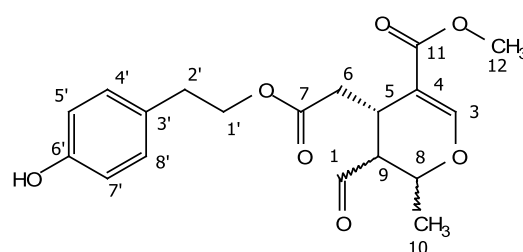

Monoaldehydic ligstroside aglycone



**Figure S13.** Mass spectral fragmentation of the  $[M-H]^-$  ion of a) oleacein, b) oleocanthal, c) monoaldehydic oleuropein aglycone, d) monoaldehydic ligstroside aglycone and e) hydroxytyrosol-d<sub>5</sub>. Cone voltage (V) and collision energy (eV) used for each mass spectrum are shown in parentheses.

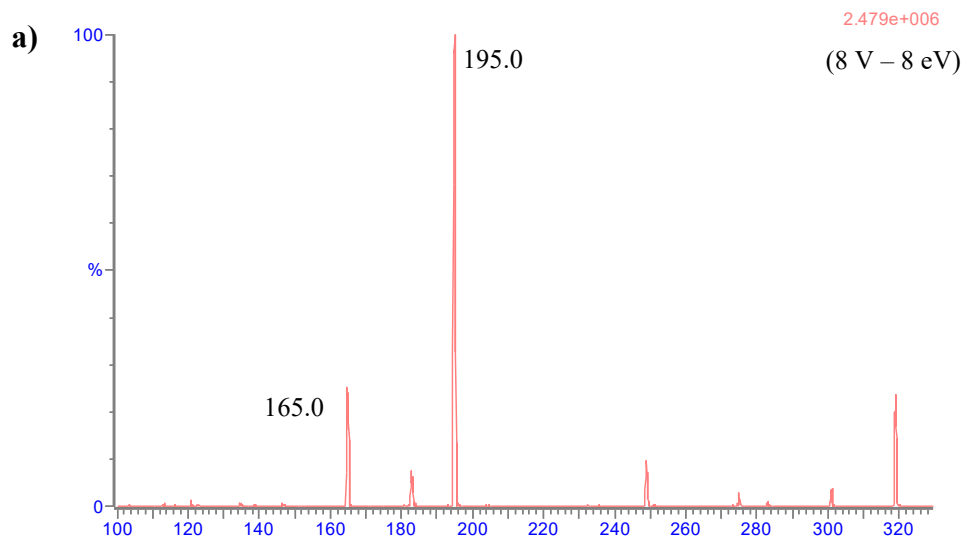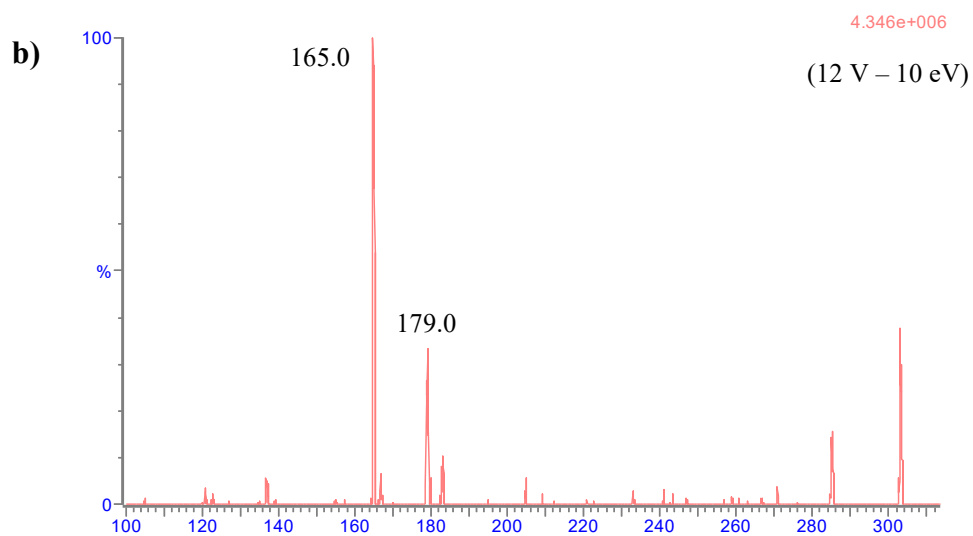

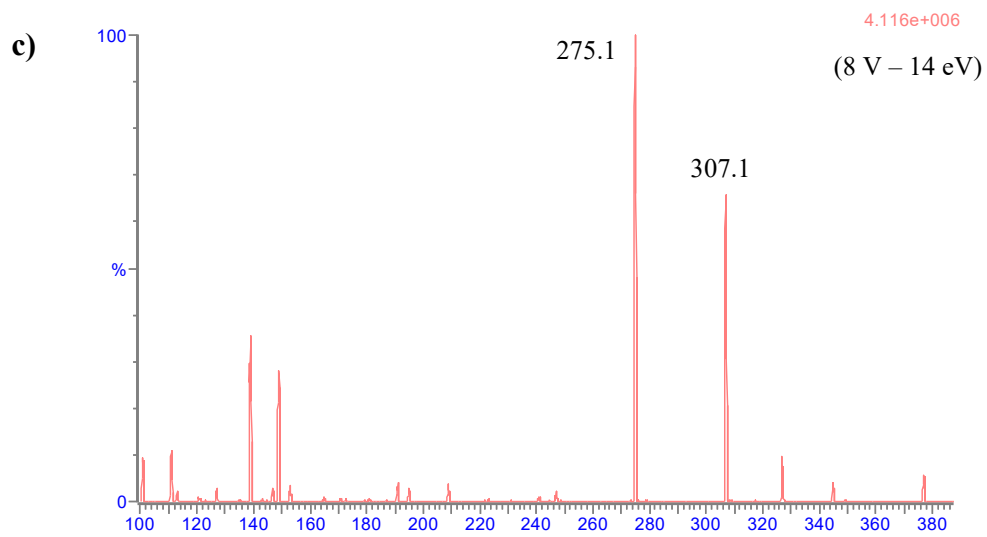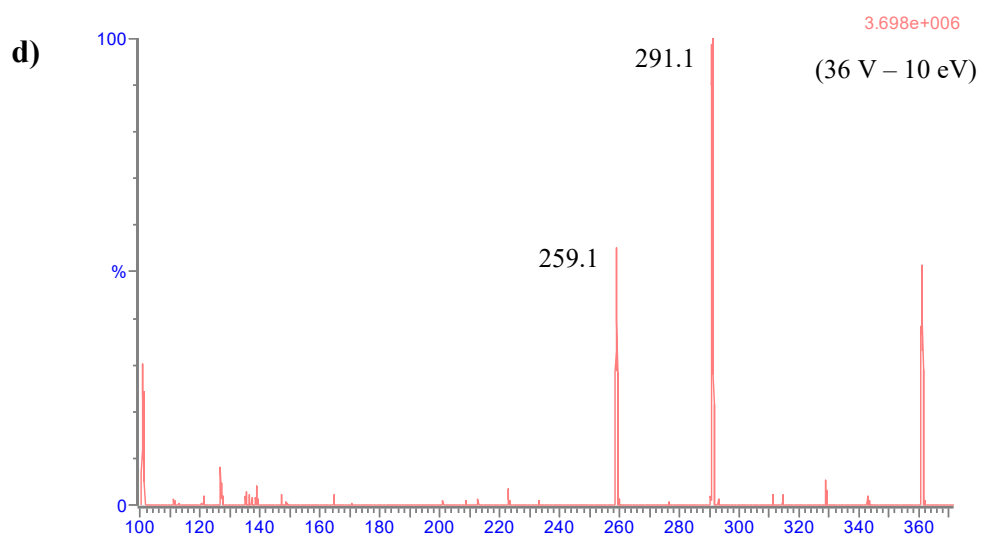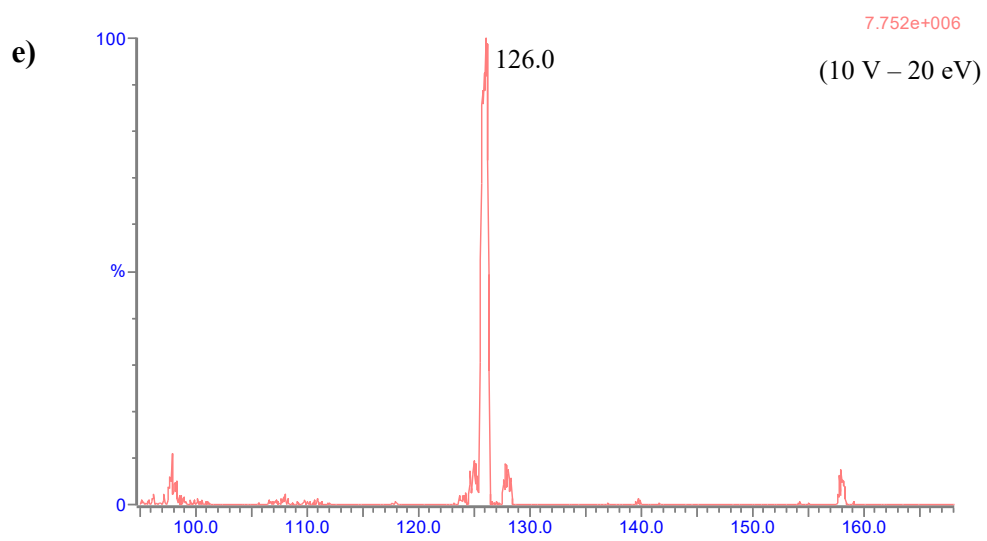

**Figure S14.** Proposed fragmentation mechanisms for **3**, **4**, **5** and **6** according to the bibliography shown in Table 1.

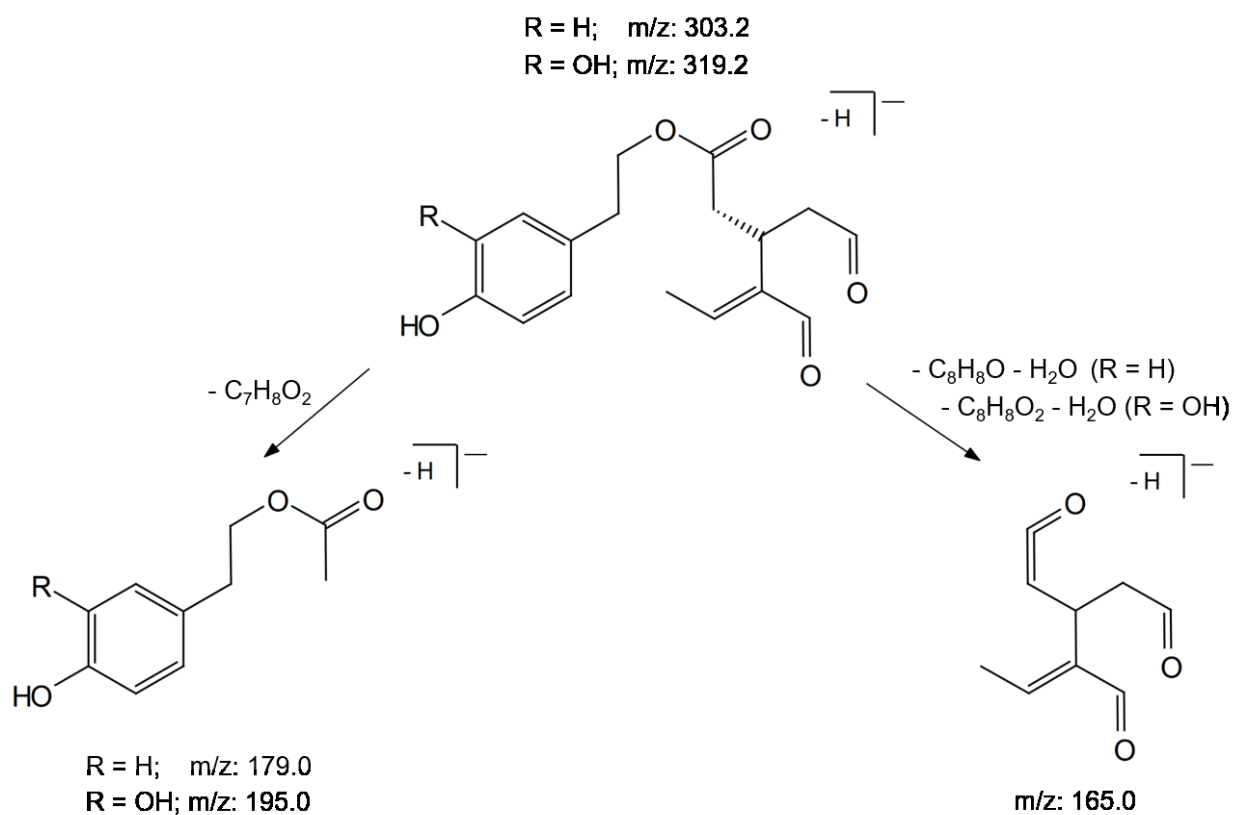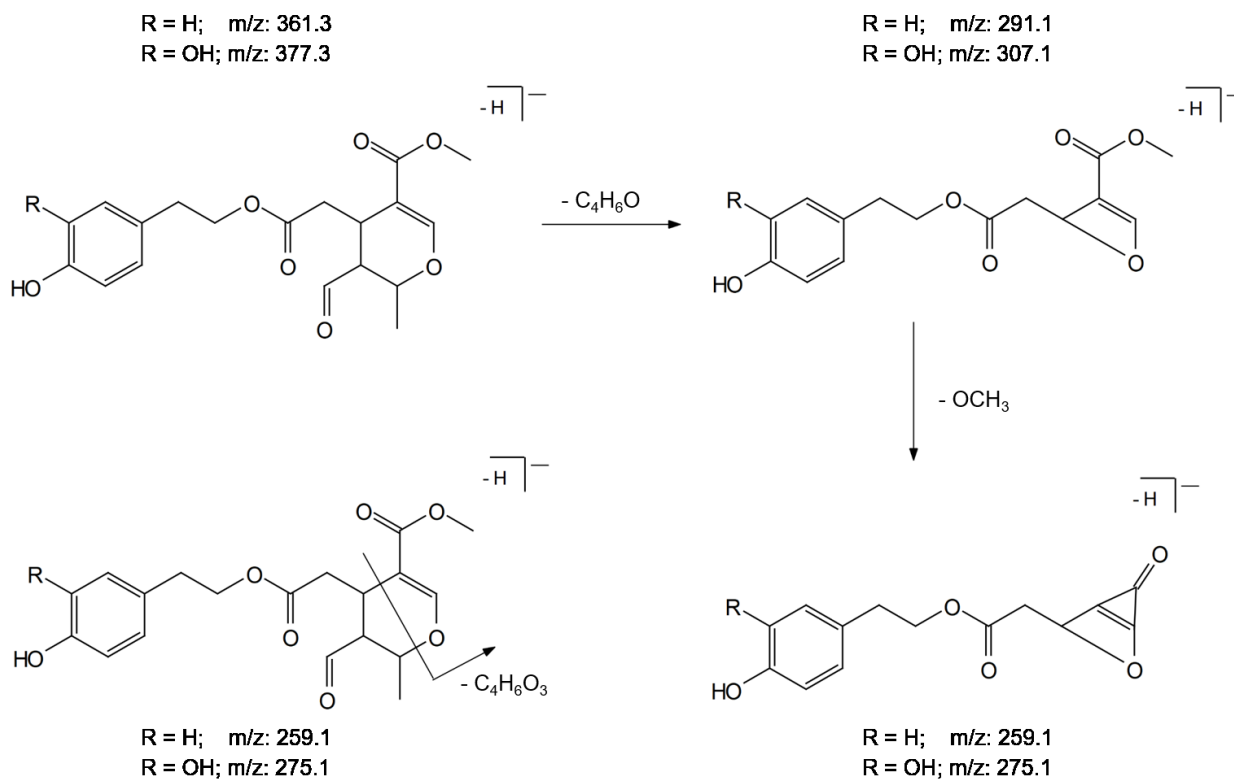

**Figure S15.** Chromatograms of ACN injections after analyzing a sample ( $V_a=25 \mu\text{L}$ ;  $N=80$ ). Chromatographic gradient without THF (left) and with THF (right).

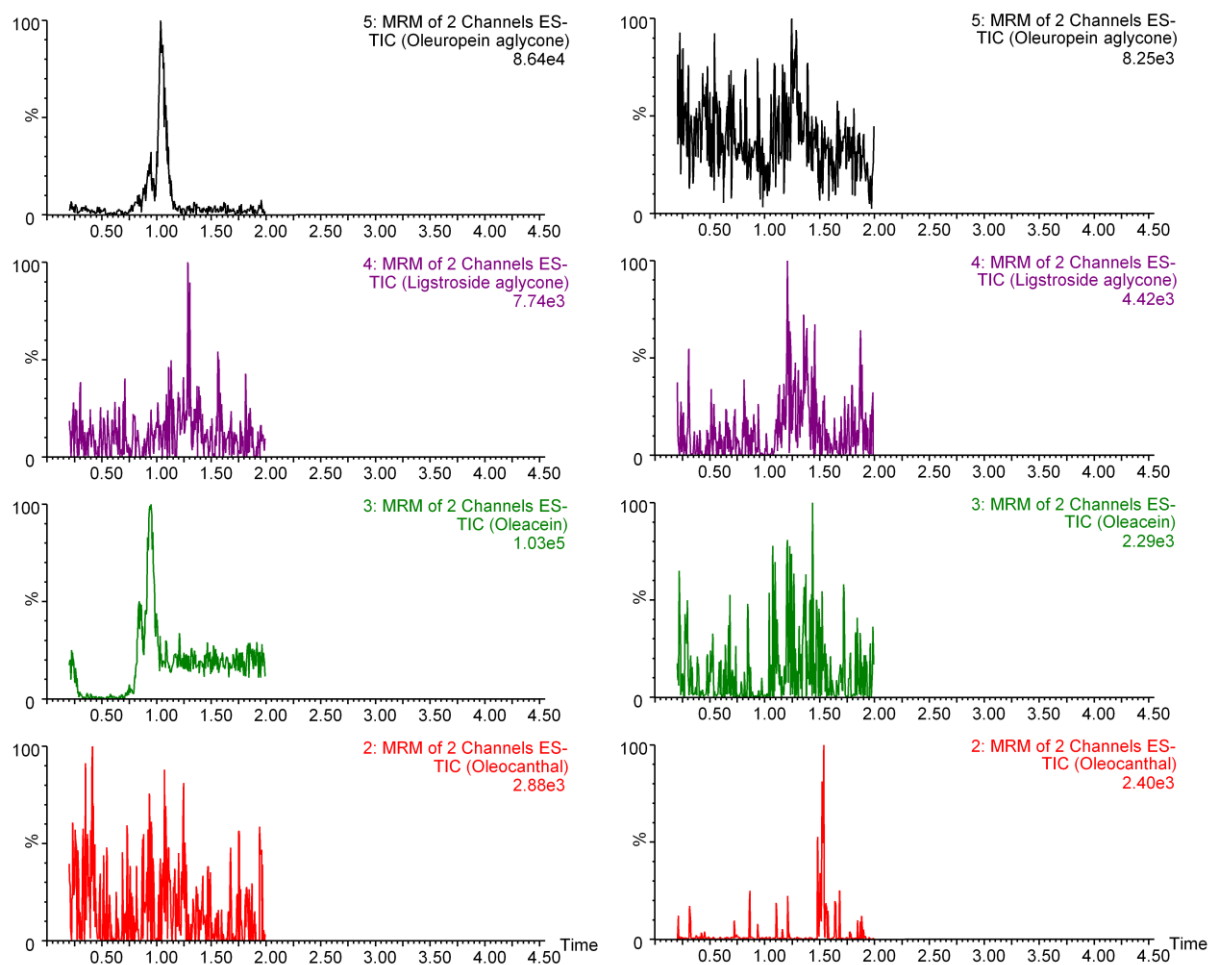

**Table S3.** Chromatographic program of the analytical method.

| Time (min) | % A | % B | % C |                         |
|------------|-----|-----|-----|-------------------------|
| 0.0        | 30  | 70  | 0   | Isocratic separation    |
| 2.0        | 30  | 70  | 0   |                         |
| 2.1        | 0   | 100 | 0   | Column cleaning         |
| 3.5        | 0   | 100 | 0   |                         |
| 4.0        | 0   | 0   | 100 |                         |
| 4.4        | 0   | 0   | 100 |                         |
| 4.5        | 30  | 70  | 0   | Equilibration of column |
| 7.5        | 30  | 70  | 0   |                         |

## Supplementary references

1. Vougiotiannopoulou, K. *et al.* One-step semisynthesis of oleacein and the determination as a 5-lipoxygenase inhibitor. *J. Nat. Prod.* **77**, 441–445 (2014).
2. Nardi, M. *et al.* Biomimetic synthesis and antioxidant evaluation of 3,4-DHPEA-EDA [2-(3,4-hydroxyphenyl) ethyl (3S,4E)-4-formyl-3-(2-oxoethyl)hex-4-enoate]. *Food Chem.* **162**, 89–93 (2014).
3. Montedoro, G. *et al.* Simple and Hydrolyzable Compounds in Virgin Olive Oil. 3. Spectroscopic Characterizations of the Secoiridoid Derivatives Gianfrancesco. *J. Agric. Food Chem.* **41**, 2228–2234 (1993).
4. Owen, R. W. *et al.* Identification of lignans as major components in the phenolic fraction of olive oil. *Clin. Chem.* **46**, 976–988 (2000).
5. Pérez-Trujillo, M., Gómez-Caravaca, A. M., Segura-Carretero, A., Fernández-Gutiérrez, A. & Parella, T. Separation and identification of phenolic compounds of extra virgin Olive Oil from *Olea Europaea* L. by HPLC-DAD-SPE-NMR/MS. Identification of a new diastereoisomer of the aldehydic form of oleuropein aglycone. *J. Agric. Food Chem.* **58**, 9129–9136 (2010).
6. Christophoridou, S., Dais, P., Tseng, L. I. H. & Spraul, M. Separation and identification of phenolic compounds in olive oil by coupling high-performance Liquid Chromatography with Postcolumn Solid-Phase Extraction to Nuclear Magnetic Resonance Spectroscopy (LC-SPE-NMR). *J. Agric. Food Chem.* **53**, 4667–4679 (2005).
7. Gariboldi, P., Jommi, G. & Verotta, L. Secoiridoids from *Olea europaea*. *Phytochemistry* **25**, 865–869 (1986).
8. Çaliş, İ., Hosny, M., Khalifa, T. & Nishibe, S. Secoiridoids from *Fraxinus angustifolia*. *Phytochemistry* **33**, 1453–1456 (1993).
